# Genome-wide association studies on malaria in Sub-Saharan Africa: a scoping review

Morine Akoth<sup>1</sup>, John Odhiambo<sup>1</sup>, Bernard Omolo<sup>1,2,3</sup>

**1** Strathmore Institute of Mathematical Sciences, Strathmore University Ole Sangale road, Nairobi, Kenya

**2** Division of Mathematics & Computer Science, University of South Carolina-Upstate, 800 University Way, Spartanburg, USA

**3** School of Public Health, Faculty of Health Science, University of the Witwatersrand

\* makoth@strathmore.edu

## Abstract

**Background:** Malaria remains one of the leading causes of death in Sub-Saharan Africa (SSA). The scoping review mapped evidence in research on existing studies on malaria genome-wide association studies (GWAS) in SSA.

**Methods:** A scoping review was conducted to investigate the extent of malaria studies in SSA under GWAS. The review followed the methodology for scoping reviews developed by Arksey and O'Malley, including identification of research problems, searching for relevant studies, selecting studies, charting data, collating, summarizing, and reporting the findings. Data from relevant studies were collected and synthesized using Excel and Zotero software. The data collected included information on the author, the years of study, the countries of study, the research areas of interest, and the study designs used.

**Results:** Of an initial pool of over 2000 articles retrieved from four databases, namely Google Scholar, PubMed, Scopus, and Web of Science, 569 were retained. After applying the inclusion-exclusion criteria, 99 articles were found to be relevant. Most of these studies (n=25, 60%) used a case-control study design, while the rest used cross-sectional, cohort, longitudinal, family-based, and retrospective designs. These studies were conducted between 2000 and 2023, with a significant increase observed in 2011. Most studies were carried out in Kenya (n = 25), Gambia (n = 17), Cameroon (n = 15), Ghana (n = 12), and Tanzania (n=11), primarily exploring genetic variants associated with malaria susceptibility, resistance, and severity.

**Conclusion:** Many case-control studies in Kenya and Gambia reported genetic variants in malaria susceptibility, resistance, and severity. Few articles were systematic reviews and scoping reviews. GWAS on malaria is scarce in SSA and even fewer studies are model-based. Consequently, there is a pressing need for more genome-wide research on malaria in SSA.

**Keywords:** Genome-wide association studies, malaria, Sub-Saharan Africa, scoping review.

## Introduction

Genome-wide association studies (GWAS) are a powerful tool to identify genes linked to human diseases, attracting global attention among researchers [1]. Malaria GWAS is vital among the African population, as the disease continues to be a challenge that takes

1  
2  
3  
4

a heavy toll on human health and socioeconomic development [2–6]. The World Health Organization (WHO) report estimated 599 thousand deaths in the year 2020, and 234 million cases in the year 2021 in Africa, accounting for 95% of the global malaria cases [7, 8]. GWAS have become powerful tools for understanding the genetic basis of complex diseases, including susceptibility, severity, and resistance to malaria [9–12]. Through studying the entire genome for associations between genetic variants and disease phenotypes, GWAS has provided information on the genetic architecture of malaria-related traits, paving the way for the development of targeted interventions and personalized therapies [13]. In the context of SSA, where genetic diversity is particularly high [14] and the malaria burden is felt [9], GWAS holds immense promise for advancing our understanding of malaria epidemiology, pathogenesis, and treatment outcomes.

Most GWAS have been conducted in Europe and Asia [15, 16], and Europe has reported bias in large-scale genomic studies. The international consortia for collaboration of genetic studies have left out Africa due to limited data and resources [17]. This has led many African countries not being represented in the research despite the genetic diversity among African populations [14, 18, 19]. Despite all these, the field of genomics has advanced considerably due to a few current initiatives. Some of these initiatives are 54Gene, The African Centre of Excellence for Genomics of Infectious Diseases (ACEGID), Inqaba Biotec (Africa’s Genomics Company), and The Human Heredity and Health in Africa (H3Africa) Consortium [20]. Ziyaad and colleagues [21], for instance established the *H3Africa Archive* for African human genomic data management. This effort aimed to facilitate data sharing and access, addressing the challenge of accessing high-throughput technologies in genomics.

Therefore, the primary objective of this scoping review was to chart the existing GWAS on malaria in the SSA. The databases were systematically searched to identify eligible studies published in English from January 2000 to December 2023. The year of study, study designs, subject areas, and countries of study were mapped and reported. A search strategy was developed to identify relevant literature using the Arksey and O’Malley [22] framework. The search was tailored to four databases: Google Scholar, PubMed, Scopus, and Web of Science. The search terms used were “Genome-wide association studies”, “Malaria resistance”, “Malaria”, “Genetic association testing”, and “Sub-Saharan Africa”. All searches included journal articles that were peer-reviewed.

## Methods

### Study design

The study design aimed to conduct a comprehensive search for studies on GWAS in malaria within the SSA region, following the framework established by Arksey and O’Malley [22]. The framework has five steps: identifying the research question, identifying relevant studies, selecting studies, charting data, collating, summarizing, and reporting the data.

#### *Identifying research question*

The main research question for the scoping review was: What are the existing genome-wide association studies on malaria in SSA conducted between 2000 and 2023? Table 1 shows the population, concept, and context guide (PCC) used to assess the eligibility of the research question and to guide the selection of studies derived from the Joanna Briggs Institute [23].

**Table 1.** PCC framework used to determine the eligibility of the research question and to guide the selection of studies on GWAS in malaria.

|                   |                                            |
|-------------------|--------------------------------------------|
| <i>Population</i> | General population (adults and children)   |
| <i>Concept</i>    | Genome-wide association studies in malaria |
| <i>Context</i>    | Sub-Saharan Africa                         |

### *Identifying relevant studies*

Identifying relevant articles required a comprehensive search from 2000 to 2023 in four databases: Google Scholar, Scopus, PubMed, and Web of Science. These are life science journals with biomedical literature.

### *Search strategy*

A methodology was devised to examine the existing GWAS on malaria in SSA. Furthermore, the research sought to identify and investigate model-based studies that addressed the concept of heterosis. We searched the literature on malaria GWAS using the mentioned databases with the last search conducted on January 21, 2024, and included all articles published up to December 31, 2023. A combination of the following keywords was used: “Genome-wide association studies”, “Malaria resistance”, “Malaria”, “Genetic association testing”, and “Sub-Saharan Africa”. A total of 569 articles were initially retrieved from the four databases. Following the removal of duplicates and irrelevant articles, a screening process was applied to 99 articles. The Preferred Reporting Items for Systematic Reviews and Meta-Analysis extension for scoping reviews (PRISMA-ScR) guidelines were followed to identify, select, and include relevant articles [24].

### *Inclusion and exclusion criteria*

The criteria for inclusion of articles in the scoping review were as follows: The study must be a GWAS conducted in SSA between January 2000 and December 2023, and focused on malaria, the study must be published in English, and the study must have the full text available. The exclusion criteria consisted of the following: GWAS conducted outside the SSA region, studies related to malaria that did not fall under the scope of GWAS, studies conducted in the regions of Algeria, Egypt, Morocco, Tunisia, and Libya, studies investigating non-malarial phenotypes and systematic review, meta-analysis, and other reviews.

### *Selecting studies*

The titles of selected articles from various repositories were filtered and then identified, and duplicates were removed using Excel software. The primary data extraction tool employed was Microsoft Excel, while Zotero served as the reference management software for extracting and organizing citation details. Microsoft Excel was also used to manage and chart extracted data. Two independent reviewers evaluated the abstracts of qualified articles based on predetermined inclusion and exclusion criteria and resolved any discrepancies. Articles on reviews and systematic studies were recorded but were excluded from the scoping review. The database searches, keywords used, and the number of selected articles were noted.

### *Charting the data*

Information was extracted using the Excel software, including author names, publication dates, article titles, study designs, study country, study areas, genetic modes of inheritance for the model-based studies, genetic variants associated with malaria for some studies, and other significant findings. Two independent reviewers performed data extraction and analysis of the selected studies by manually studying full articles. Quality assessment for studies followed established screening criteria, and for review, the PRISMA-ScR guidelines were applied for quality evaluation.

### *Collating, summarizing and reporting results*

Emerging themes related to GWAS in malaria were summarized. A descriptive analysis of peer-reviewed papers published and addressed the research question. The research covered various aspects, including the year of publication, the number of publications in different countries in SSA, the different study designs used, the categorization of subject areas into distinct categories such as susceptibility to malaria, severe malaria, and resistance, the methodologies used to evaluate genetic association, drug resistance, population diversity, and host-parasite interactions. Tables and graphs were employed where appropriate to represent the findings visually. *R* software was used to summarize and categorize the data. *SRplot* platform, a data visualization and graphing tool ([25]), was also utilized to create the figures in compliance with the required standards. The scoping review results were used to identify knowledge gaps on malaria GWAS in SSA. The data and materials linked to this study are now available through the Open Science Framework (OSF) repository at <https://doi.org/10.17605/OSF.IO/DFK5G>.

## **Results**

A total of 569 studies were found in four electronic databases (Google Scholar (n=476), PubMed (n=29), Web of Science (n=8), and Scopus (n=56)). After removing 89 duplicate and 370 ineligible records for various reasons (not within the human population, not malaria GWAS and not published in English), 117 unique records underwent title and abstract screening. Of these, 9 records were irrelevant and excluded (4 non-GWAS, 4 non-malaria phenotypes, 1 not from the human population), leaving 108 reports for full-text retrieval. However, five records were either inaccessible or only had abstracts published, leaving 103 full-text reports for eligibility assessment by at least two reviewers. After full-text screening, four more records were excluded and 99 studies were included in this scoping review (Fig 1).

**Fig 1.** Preferred Reporting Items for Systematic Reviews and Meta-Analysis extension for 64 scoping reviews (PRISMA-ScR) on malaria GWAS in SSA.

### *Study designs and areas*

The predominant study design among the included investigations was case-control studies ( $n = 25, 60\%$ ) [9, 10, 26–50], followed by cohort studies ( $n = 8, 19\%$ ) [51–58], then family-based studies ( $n = 6, 14\%$ ) [34, 59–61], cross-sectional and longitudinal studies ( $n = 3, 6\%$ ) [57, 62, 63]. In the study, systematic reviews ( $n = 14$ ) [9, 30, 49, 64–69] and reviews ( $n=7$ ) [16, 70–76], were also reported. Furthermore, there was a retrospective study [77] (Fig 3).

Most GWAS on malaria focused on identifying genetic variants associated with susceptibility, resistance, and severity of malaria [2, 8–10, 26, 27, 29–38, 41, 42, 44–50, 52, 54–58, 61, 63–65, 67–69, 71, 74, 78–83]. Furthermore, considerable research had been conducted on methodological approaches to genetic association testing, malaria drug resistance patterns exhibited by malaria parasites, and the effectiveness of vaccine interventions [31, 40, 43, 46, 51, 59, 60, 70, 75, 77, 81, 84–100]. Other areas of study included host-parasite interactions, population diversity and structures, genetic variation and evolutionary insights such as gene flow and natural selection [8, 16, 30, 56–58, 61, 68, 71, 101–108] and Mendelian randomization [109] (Fig 4)

### *Year of study and spatial distribution of studies*

Studies reported were published between 2000 and 2023, with a noticeable increase in publications from 2011 as shown in Fig 2.

**Fig 2.** Number of articles in malaria GWAS in SSA published between 2000 and 2023.

**Fig 3.** Different study designs used in malaria GWAS.

**Fig 4.** Different research areas in malaria GWAS in SSA.

The study covered 27 different locations across various countries in SSA, with Kenya having the highest number of articles (n=25) [9, 30, 35, 35, 36, 40–42, 46, 49, 50, 56, 64, 71, 80, 83, 85, 87, 91, 93, 98, 109–111] as shown in Fig 5. Other countries included Gambia (n=17) [9, 26, 30, 34, 35, 40, 42, 43, 45, 56, 61, 64, 67, 90], Cameroon (n=15) [9, 28, 35, 51, 53, 71, 109, 112], Tanzania (n=11) [9, 27, 35, 37, 55, 87, 109, 113, 114], Ghana (n=12) [10, 42, 69, 94, 97, 100, 102], Malawi (n=7) [35, 42, 56, 57, 64, 91, 96], Burkina Faso (n=4) [35, 36, 52, 115], Uganda (n=3) [69, 96, 104], South Africa (n=1) [2], Togo (n=3) [94, 100, 105], Mali (n=2) [48, 63], Benin (n=7) [47, 58, 94–96, 99, 100], Ethiopia (n=2) [71, 77], Ivory Coast (n=4) [44, 94, 100, 107], Mozambique (n=1) [39], Nigeria (n=2) [35, 93], Guinea (n=1) [102] Senegal (n=5) [8, 60, 68, 88, 107], Sudan (n=1) [61], Mauritania (n=1) [71], Equatorial Guinea (n=1) [71], Angola (n=1) [71], Democratic republic of Congo (n=1) [107] and Madagascar (n=1) [71]. Some studies covered more than one region of SSA and the research design was mainly systematic reviews and meta-analyses [9, 30, 56, 64, 115]. There were no malaria GWAS in some SSA regions such as Rwanda, Somalia, Chad, Namibia, Sierra Leone, Niger and Burundi.

The research areas were further categorized into four distinct geographical regions namely, Western Africa (West), Southern Africa (Southern), Eastern Africa (Eastern), and Central Africa (Central) regions as shown in Fig 7. Many articles were mapped in the Western Africa region with Gambia having the highest number of articles (n=17).

**Fig 5.** SSA countries conducting GWAS in malaria mapped with publications.

**Fig 6.** Polygon areas proportional to the number of studies conducted in SSA in different regions of Western Africa (W), Eastern Africa (E), Southern Africa (S), and Central Africa (C).

## Genetic variants and malaria

Most studies focused on genetic variants associated with susceptibility, severity and resistance to malaria (n=54) [2, 8–10, 26, 27, 29–38, 41, 42, 44–50, 52, 54–58, 61, 63–65, 67–69, 71, 74, 78–83]. Table 2 shows some single nucleotide polymorphisms (SNPs) and genes associated with malaria protection, and severity. The five studies [27, 37, 59, 63, 67] had genetic modes of inheritance on variants associated with malaria severity and protection. The studies are model-based, with heterosis, as one of the genetic inheritance modes associated with severe or mild malaria phenotypes. Ranvehall et al. [27] reported the most significant SNP association as the heterozygous protective rs334 significantly associated with resistance to severe disease. Manjurano et al. [37] reported the G6PD gene with heterozygous advantage effect which has a deficiency known to protect against severe malaria in the Tanzanian populations. Maiga et al. [63] reported some of the 19 regions of the genome under heterozygous advantage with significant SNPs associated with severe malaria. Other genetic models reported were the additive, recessive, and dominant modes in the studies.

Studies on systematic reviews and meta-analysis( [8–10, 30, 64]), also included genetic models with studies by Kivinen et al. [30] including heterozygous mode of inheritance in the multi-center GWAS. Patterns of association with severe malaria were reported.

**Table 2.** Associated SNPs and genes with protection, and severe malaria with underlying genetic models in the studies

| Author                     | Genetic model | Associated SNPs/ Genes                                  | Outcome    |
|----------------------------|---------------|---------------------------------------------------------|------------|
| Jallow et al. 2009 [67]    | Heterosis     | rs10890361, rs316414, rs10249420                        | Severe     |
|                            | Additive      | rs5488069, rs2046784, rs2949632                         | Severe     |
|                            | Dominant      | rs10192428, rs12405994, rs16957052                      | Severe     |
| Maiga et al. 2014 [63]     | recessive     | rs1384057 ,rs11013140, rs17728971                       | Severe     |
|                            | Heterosis     | rs4898389, rs7879049                                    | Severe     |
|                            | Additive      | rs2515905, r1050828                                     | Severe     |
| Manjurano et al. 2015 [37] | Dominant      | rs915942                                                | Severe     |
|                            | Recessive     | rs915941, rs1050828                                     | Severe     |
|                            | Heterosis     | G6PD376, rs762515, rs2515905                            | Protection |
| Ravenhall et al. 2018 [27] | Heterosis     | rs334, rs9296359, rs113449872                           | Severe     |
|                            | Additive      | rs149085856, rs17624383, rs2967790, rs144312177         | Severe     |
|                            | Recessive     | rs3832816, rs8109875, rs6682413                         | Severe     |
| Milet et al. 2016 [59]     | Dominant      | rs16942900 , rs3821869, rs12946796, rs10905522          | Protection |
|                            | Additive      | rs10757705, rs17640520, rs6675815, rs11679441, rs453079 | Protection |
|                            | Recessive     | rs971990, rs7694946, rs7123288                          | Protection |

**Fig 7.** Percentage representation of GWAS research in malaria globally compared to SSA studies found on Google Scholar search between 2000 and 2023.

## Discussion

This scoping review aimed to identify existing malaria GWAS in SSA. A search was performed on Google Scholar, Pubmed, Scopus, and Web of Science and the results are highlighted in Fig 1. It included 99 articles with some studies covering topics in susceptibility, resistance, and severity of malaria, where genetic variants associated with malaria have been discovered and provided vital information. The number of studies conducted in SSA was significantly lower than the extensive global search for malaria GWAS, which produced 8,970 articles on Google Scholar (Fig 7). The research showed an increasing number of articles over time (Fig 2). In over 23 years, publications in malaria GWAS have consistently increased. The upward trend indicates that GWAS is increasingly recognized as a valuable tool for understanding the genetic factors that impact malaria susceptibility, resistance, and severity in SSA.

Most studies were conducted in Kenya and Gambia (Fig 5). The other countries with articles in malaria GWAS included Ghana, Cameroon, Tanzania, Burkina Faso, Benin, Uganda, Malawi, South Africa, Ethiopia, Ivory Coast, Senegal, Guinea, Congo, Angola, Mali, Sudan, Mauritania, Nigeria, Togo, Guinea, Mozambique, Equatorial Guinea and Madagascar. Despite being malaria-prone regions, some countries had no studies reported on the subject area. These included Zambia, Rwanda, Somalia, Chad, Namibia, Sierra Leone, Niger, Eritrea, Liberia, Burundi, Central African Republic, and Lesotho. Fig 6 further highlights the number of studies per region classified as Western, Eastern, Southern, and Central Africa. Many studies were reported in the Western region with Gambia having the highest number of publications in the region. Previous studies have uncovered more than 3 million genetic variants from African populations, some considered novel [17]. The diverse genetic variants have been observed among different ethnic communities; hence the potential to use knowledge to understand disease mechanisms and drug targets in clinical practices [16,116]. Gouveia and colleagues [104] reported a high genetic diversity in Eastern Africa, while Ndo et al. [107] reported similar results in Western Africa. Although Africa is the continent with the highest genetic diversity, it has hosted only 2% of worldwide GWAS [17]. Studies on genetic diversity have shown that most GWAS focus mainly on European populations as highlighted in studies such as Sirugo et al. (2019) [117] and Melzer et al. (2020) [118]. Despite Africa's significant genetic diversity, GWAS have not adequately been conducted in SSA.

Most study designs were case-control, accounting for 60% of the articles (Fig 3). Case-control studies have been used for investigating disease risk factors and outcomes. They are less costly and less time-consuming in comparison to other study designs. In contrast to linkage studies, which require large sample sizes, case-control studies can detect genes that contribute only a minor fraction to the overall likelihood of a disease [119]. Heightened sensitivity is crucial in unraveling complex genetic associations. Studies on systematic reviews, meta-analyses, and other reviews were also noted. In addition, cohort, cross-sectional, and longitudinal designs were reported.

Many studies focused on susceptibility, severity, resistance, and associated genetic variants of malaria (Fig 4). Some studies reported SNPs and genes associated with protection and severe malaria outcomes under different genetic models (Table 2). Jallow et al. [67] reported regions with the strongest signal and associated models with the most significant SNPs found in dominant, trend, recessive, and heterozygous advantage models. Maiga et al. [63] reported significant SNPs found in dominant and heterozygous models associated with malaria phenotypes. Manjurano et al. [37] reported some associated SNPs found among female heterozygotes that offer protection against severe malaria. Other SNPs showed associations in additive, and recessive modes, as noted by Ravenhall et al. [27] in the Tanzanian population. The four Studies ( [27,37,63,67]) reported genetic variants, under heterotic mode of inheritance, associated with both

severity and protection from malaria while studies by Milet et al. [59] conducted GWAS in children from Senegal and found more SNPs associated with protection against malaria under the additive, recessive, and dominant models. A recommendation to replicate such studies in other parts of Africa was suggested.

Furthermore, methodological tools, drug resistance patterns investigations, and intervention effectiveness evaluations emphasize the comprehensive nature of GWAS. For example, studies by Milet et al. [59] looked at the GWAS of antibody response to malaria vaccines while Ali et al. [53], studied the prevalence of drug resistance mutations among children in Cameroon. Several studies have used various statistical techniques, including Bayesian modeling [90] and generalized linear models [95], to explore genetic associations with malaria. Similar GWAS in other regions or those that address different phenotypes in SSA have adopted diverse methodologies [120–127], to investigate genetic associations with the respective phenotype. In addition, a range of GWAS software tools, such as *input2* as a framework used to impute genotypes, *bear* [93] and *R* [125], have been used to assess genetic correlations and explore associated genetic loci. A few studies on host-parasite interactions and evolutionary insights were also reported.

## Conclusion

The findings in genetic studies on malaria in SSA highlight the significant efforts put in to deepen our understanding of malaria. These efforts include an increasing number of publications, the use of various methodological approaches, research on a diverse population, and the study of malaria in different geographic locations. However, despite the considerable genetic diversity observed in SSA, global representation in research volume still needs to be achieved. There is also a lot of untapped potential to develop novel methodologies and discover more genetic loci related to susceptibility, resistance, and severity of malaria.

The African Genome Variation project and the Africa BioGenome projects, among other projects, have enabled genetic disease studies in SSA by discovering millions of genetic variants [128, 129]. Such projects provide platforms for collaborations and partnerships among African scientists through biodiversity genomics.

## Supporting information

*R* software and *SRplot* platform for data visualization and graphing were used.

## Acknowledgments

We acknowledge and express our gratitude to Strathmore University for their support during this research.

## References

1. Consortium WTCC. Genome-wide association study of 14,000 cases of seven common diseases and 3,000 shared controls. *Nature*. 2007;447(7145):661-78.
2. Kwiatkowski DP. How malaria has affected the human genome and what human genetics can teach us about malaria. *The American Journal of Human Genetics*. 2005;77(2):171-92.



3. Hedrick PW. Resistance to malaria in humans: the impact of strong, recent selection. *Malaria journal*. 2012;11(1):1-7.
4. Snow RW, Guerra CA, Noor AM, Myint HY, Hay SI. The global distribution of clinical episodes of *Plasmodium falciparum* malaria. *Nature*. 2005;434(7030):214-7.
5. Bhatt S, Weiss D, Cameron E, Bisanzio D, Mappin B, Dalrymple U, et al. The effect of malaria control on *Plasmodium falciparum* in Africa between 2000 and 2015. *Nature*. 2015;526(7572):207-11.
6. Oriero EC, Amenga-Etego L, Ishengoma DS, Amambua-Ngwa A. *Plasmodium malariae*, current knowledge and future research opportunities on a neglected malaria parasite species. *Critical reviews in microbiology*. 2021;47(1):44-56.
7. Organization WH, et al. World malaria report 2022. World Health Organization; 2022.
8. Thiam A, Nisar S, Adjemout M, Gallardo F, Ka O, Mbengue B, et al. ATP2B4 regulatory genetic variants are associated with mild malaria. *Malaria Journal*. 2023;22(1):1-7.
9. Insights into malaria susceptibility using genome-wide data on 17,000 individuals from Africa, Asia and Oceania. *Nature communications*. 2019;10(1):5732.
10. Timmann C, Thye T, Vens M, Evans J, May J, Ehmen C, et al. Genome-wide association study indicates two novel resistance loci for severe malaria. *Nature*. 2012;489(7416):443-6.
11. Bryc K, Auton A, Nelson MR, Oksenberg JR, Hauser SL, Williams S, et al. Genome-wide patterns of population structure and admixture in West Africans and African Americans. *Proceedings of the National Academy of Sciences*. 2010;107(2):786-91.
12. Williams TN, Mwangi TW, Roberts DJ, Alexander ND, Weatherall DJ, Wambua S, et al. An immune basis for malaria protection by the sickle cell trait. *PLoS medicine*. 2005;2(5):e128.
13. Timmann C, Evans JA, König IR, Kleensang A, Rüschenhoff F, Lenzen J, et al. Genome-wide linkage analysis of malaria infection intensity and mild disease. *PLoS genetics*. 2007;3(3):e48.
14. Campbell MC, Tishkoff SA. African genetic diversity: implications for human demographic history, modern human origins, and complex disease mapping. *Annu Rev Genomics Hum Genet*. 2008;9:403-33.
15. Visscher PM, Wray NR, Zhang Q, Sklar P, McCarthy MI, Brown MA, et al. 10 years of GWAS discovery: biology, function, and translation. *The American Journal of Human Genetics*. 2017;101(1):5-22.
16. Bien SA, Wojcik GL, Hodonsky CJ, Gignoux CR, Cheng I, Matise TC, et al. The future of genomic studies must be globally representative: perspectives from PAGE. *Annual review of genomics and human genetics*. 2019;20:181-200.
17. Bentley AR, Callier S, Rotimi CN. Diversity and inclusion in genomic research: why the uneven progress? *Journal of community genetics*. 2017;8:255-66.

18. Oni-Orisan A, Mavura Y, Banda Y, Thornton TA, Sebro R. Embracing genetic diversity to improve black health. *Mass Medical Soc*; 2021.
19. Pfennig A, Petersen LN, Kachambwa P, Lachance J. Evolutionary genetics and admixture in African populations. *Genome Biology and Evolution*. 2023;15(4):evad054.
20. Omotoso OE, Teibo JO, Atiba FA, Oladimeji T, Adebessin AO, Babalghith AO. Bridging the genomic data gap in Africa: implications for global disease burdens. *Globalization and Health*. 2022;18(1):103.
21. Parker Z, Maslamoney S, Meintjes A, Botha G, Panji S, Hazelhurst S, et al. Building infrastructure for African human genomic data management. *Data Science Journal*. 2019;18:47-7.
22. Westphaln KK, Regoeczi W, Masotya M, Vazquez-Westphaln B, Lounsbury K, McDavid L, et al. From Arksey and O'Malley and Beyond: Customizations to enhance a team-based, mixed approach to scoping review methodology. *MethodsX*. 2021;8:101375.
23. Peters MD, Marnie C, Tricco AC, Pollock D, Munn Z, Alexander L, et al. Updated methodological guidance for the conduct of scoping reviews. *JBIM evidence synthesis*. 2020;18(10):2119-26.
24. Tricco AC, Lillie E, Zarin W, O'Brien KK, Colquhoun H, Levac D, et al. PRISMA extension for scoping reviews (PRISMA-ScR): checklist and explanation. *Annals of internal medicine*. 2018;169(7):467-73.
25. Tang D, Chen M, Huang X, Zhang G, Zeng L, Zhang G, et al. SRplot: A free online platform for data visualization and graphing. *PLoS One*. 2023;18(11):e0294236.
26. Loley C, König IR, Hothorn L, Ziegler A. A unifying framework for robust association testing, estimation, and genetic model selection using the generalized linear model. *European Journal of Human Genetics*. 2013;21(12):1442-8.
27. Ravenhall M, Campino S, Sepúlveda N, Manjurano A, Nadjm B, Mtove G, et al. Novel genetic polymorphisms associated with severe malaria and under selective pressure in North-eastern Tanzania. *PLoS genetics*. 2018;14(1):e1007172.
28. Esoh KK, Apinjoh TO, Amambua-Ngwa A, Nyanjom SG, Chimusa ER, Amenga-Etego L, et al. Genome-wide association study identifies novel candidate malaria resistance genes in Cameroon. *Human Molecular Genetics*. 2023;32(12):1946-58.
29. Manjurano A, Sepúlveda N, Nadjm B, Mtove G, Wangai H, Maxwell C, et al. USP38, FREM3, SDC1, DDC, and LOC727982 gene polymorphisms and differential susceptibility to severe malaria in Tanzania. *The Journal of infectious diseases*. 2015;212(7):1129-39.
30. Kivinen KJ. A novel locus of resistance to severe malaria in a region of ancient balancing selection. *Malaria Genomic Epidemiology Network, Band G, Rockett KA, Spencer CC, Kwiatkowski DP. Nature*. 2015 Oct 8; 526 (7572): 253-7. doi: 10.1038/nature15390. Epub 2015 Sep 30. PMID: 26416757; PMCID: PMC4629224. *Nature*. 2015:253-7.

31. Barnes C, Plagnol V, Fitzgerald T, Redon R, Marchini J, Clayton D, et al. A robust statistical method for case-control association testing with copy number variation. *Nature genetics*. 2008;40(10):1245-52.
32. Duchon D, Vergara C, Thio CL, Kundu P, Chatterjee N, Thomas DL, et al. Pathogen exposure misclassification can bias association signals in GWAS of infectious diseases when using population-based common control subjects. *The American Journal of Human Genetics*. 2023;110(2):336-48.
33. Schuldt K, Ehmen C, Sievertsen J, Evans J, May J, Ansong D, et al. Lack of association of CD55 receptor genetic variants and severe malaria in Ghanaian children. *G3: Genes, Genomes, Genetics*. 2017;7(3):859-64.
34. Ackerman H, Usen S, Jallow M, Sisay-Joof F, Pinder M, Kwiatkowski D. A comparison of case-control and family-based association methods: The example of sickle-cell and malaria. *Annals of human genetics*. 2005;69(5):559-65.
35. Fry AE, Auburn S, Diakite M, Green A, Richardson A, Wilson J, et al. Variation in the ICAM1 gene is not associated with severe malaria phenotypes. *Genes & Immunity*. 2008;9(5):462-9.
36. Leffler EM, Band G, Busby GB, Kivinen K, Le QS, Clarke GM, et al. Resistance to malaria through structural variation of red blood cell invasion receptors. *Science*. 2017;356(6343):eaam6393.
37. Manjurano A, Sepulveda N, Nadjm B, Mtove G, Wangai H, Maxwell C, et al. African glucose-6-phosphate dehydrogenase alleles associated with protection from severe malaria in heterozygous females in Tanzania. *PLoS genetics*. 2015;11(2):e1004960.
38. Shah SS, Rockett KA, Jallow M, Sisay-Joof F, Bojang KA, Pinder M, et al. Heterogeneous alleles comprising G6PD deficiency trait in West Africa exert contrasting effects on two major clinical presentations of severe malaria. *Malaria journal*. 2016;15(1):1-8.
39. Sikora M, Ferrer-Admetlla A, Laayouni H, Menendez C, Mayor A, Bardaji A, et al. A variant in the gene FUT9 is associated with susceptibility to placental malaria infection. *Human molecular genetics*. 2009;18(16):3136-44.
40. Tai KY, Dhaliwal J, Balasubramaniam V. Leveraging Mann-Whitney U test on large-scale genetic variation data for analysing malaria genetic markers. *Malaria Journal*. 2022;21(1):79.
41. Gilchrist JJ, Kariuki SN, Watson JA, Band G, Uyoga S, Ndila CM, et al. BIRC6 modifies risk of invasive bacterial infection in Kenyan children. *Elife*. 2022;11:e77461.
42. Yuan J, Cheng KCC, Johnson RL, Huang R, Pattaradilokrat S, Liu A, et al. Chemical genomic profiling for antimalarial therapies, response signatures, and molecular targets. *Science*. 2011;333(6043):724-9.
43. Howey R, Cordell HJ. Imputation Without Doing Imputation: A New Method for the Detection of Non-Genotyped Causal Variants. *Genetic epidemiology*. 2014;38(3):173-90.

44. Courtin D, Argiro L, Jamonneau V, N'dri L, N'guessan P, Abel L, et al. Interest of tumor necrosis factor- $\alpha$ - 308 G/A and interleukin-10- 592 C/A polymorphisms in human African trypanosomiasis. *Infection, Genetics and Evolution*. 2006;6(2):123-9.
45. Sabeti P, Usen S, Farhadian S, Jallow M, Doherty T, Newport M, et al. CD40L association with protection from severe malaria. *Genes & Immunity*. 2002;3(5):286-91.
46. Watson JA, Ndila CM, Uyoga S, Macharia A, Nyutu G, Mohammed S, et al. Improving statistical power in severe malaria genetic association studies by augmenting phenotypic precision. *Elife*. 2021;10:e69698.
47. Idaghdour Y, Quinlan J, Goulet JP, Berghout J, Gbeha E, Bruat V, et al. Evidence for additive and interaction effects of host genotype and infection in malaria. *Proceedings of the National Academy of Sciences*. 2012;109(42):16786-93.
48. Toure O, Konate S, Sissoko S, Niangaly A, Barry A, Sall AH, et al. Candidate polymorphisms and severe malaria in a Malian population. 2012.
49. Willcocks LC, Carr EJ, Niederer HA, Rayner TF, Williams TN, Yang W, et al. A defuncting polymorphism in FCGR2B is associated with protection against malaria but susceptibility to systemic lupus erythematosus. *Proceedings of the National Academy of Sciences*. 2010;107(17):7881-5.
50. Opi DH, Swann O, Macharia A, Uyoga S, Band G, Ndila CM, et al. Two complement receptor one alleles have opposing associations with cerebral malaria and interact with  $\alpha$ + thalassaemia. *Elife*. 2018;7:e31579.
51. Weetman D, Wilding CS, Steen K, Morgan JC, Simard F, Donnelly MJ. Association mapping of insecticide resistance in wild *Anopheles gambiae* populations: major variants identified in a low-linkage disequilibrium genome. *PloS one*. 2010;5(10):e13140.
52. Mitri C, Markianos K, Guelbeogo WM, Bischoff E, Gneme A, Eiglmeier K, et al. The *kdr*-bearing haplotype and susceptibility to *Plasmodium falciparum* in *Anopheles gambiae*: genetic correlation and functional testing. *Malaria journal*. 2015;14:1-11.
53. Ali IM, Evehe MSB, Netongo PM, Atogho-Tiedeu B, Akindeh-Nji M, Ngora H, et al. Host candidate gene polymorphisms and associated clearance of *P. falciparum* amodiaquine and fansidar resistance mutants in children less than 5 years in Cameroon. *Pathogens and global health*. 2014;108(7):323-33.
54. Johnson MK, Clark TD, Njama-Meya D, Rosenthal PJ, Parikh S. Impact of the method of G6PD deficiency assessment on genetic association studies of malaria susceptibility. *PloS one*. 2009;4(9):e7246.
55. Manjurano A, Clark TG, Nadjm B, Mtove G, Wangai H, Sepulveda N, et al. Candidate human genetic polymorphisms and severe malaria in a Tanzanian population. *PloS one*. 2012;7(10):e47463.
56. Damena D, Chimusa ER. Genome-wide heritability analysis of severe malaria resistance reveals evidence of polygenic inheritance. *Human molecular genetics*. 2020;29(1):168-76.

57. Shah Z, Naung MT, Moser KA, Adams M, Buchwald AG, Dwivedi A, et al. Whole-genome analysis of Malawian *Plasmodium falciparum* isolates identifies possible targets of allele-specific immunity to clinical malaria. *PLoS Genetics*. 2021;17(5):e1009576.
58. Henry B, Volle G, Akpovi H, Gineau L, Roussel C, Ndour PA, et al. Splenic clearance of rigid erythrocytes as an inherited mechanism for splenomegaly and natural resistance to malaria. *EBioMedicine*. 2022;82.
59. Milet J, Sabbagh A, Migot-Nabias F, Luty A, Gaye O, Garcia A, et al. Genome-wide association study of antibody responses to *Plasmodium falciparum* candidate vaccine antigens. *Genes & Immunity*. 2016;17(2):110-7.
60. Loucoubar C, Grant AV, Bureau JF, Casademont I, Bar NA, Bar-Hen A, et al. Detecting multi-way epistasis in family-based association studies. *Briefings in Bioinformatics*. 2017;18(3):394-402.
61. Elzein A. Genomic, Patterns of Selection and Differentiation in African Populations and Implications for Mapping Disease Association. Open University (United Kingdom); 2009.
62. Clark AG, Boerwinkle E, Hixson J, Sing CF. Determinants of the success of whole-genome association testing. *Genome research*. 2005;15(11):1463-7.
63. Maiga B, Dolo A, Campino S, Sepulveda N, Corran P, Rockett KA, et al. Glucose-6-phosphate dehydrogenase polymorphisms and susceptibility to mild malaria in Dogon and Fulani, Mali. *Malaria journal*. 2014;13(1):1-12.
64. Band G, Le QS, Jostins L, Pirinen M, Kivinen K, Jallow M, et al. Imputation-based meta-analysis of severe malaria in three African populations. *PLoS genetics*. 2013;9(5):e1003509.
65. Ahola-Olli AV, Würtz P, Havulinna AS, Aalto K, Pitkänen N, Lehtimäki T, et al. Genome-wide association study identifies 27 loci influencing concentrations of circulating cytokines and growth factors. *The American Journal of Human Genetics*. 2017;100(1):40-50.
66. Defo J, Awany D, Ramesar R. From SNP to pathway-based GWAS meta-analysis: do current meta-analysis approaches resolve power and replication in genetic association studies? *Briefings in Bioinformatics*. 2023;24(1):bbac600.
67. Jallow M, Teo YY, Small KS, Rockett KA, Deloukas P, Clark TG, et al. Genome-wide and fine-resolution association analysis of malaria in West Africa. *Nature genetics*. 2009;41(6):657-65.
68. Nisar S, Torres M, Thiam A, Pouvelle B, Rosier F, Gallardo F, et al. Identification of ATP2B4 regulatory element containing functional genetic variants associated with severe malaria. *International Journal of Molecular Sciences*. 2022;23(9):4849.
69. Naing C, Wong ST, Aung HH. Toll-like receptor 9 and 4 gene polymorphisms in susceptibility and severity of malaria: a meta-analysis of genetic association studies. *Malaria journal*. 2021;20(1):302.
70. Donnelly MJ, Isaacs AT, Weetman D. Identification, validation, and application of molecular diagnostics for insecticide resistance in malaria vectors. *Trends in Parasitology*. 2016;32(3):197-206.

71. Goheen MM, Campino S, Cerami C. The role of the red blood cell in host defence against falciparum malaria: an expanding repertoire of evolutionary alterations. *British journal of haematology*. 2017;179(4):543-56.
72. Gibbs KD, Schott BH, Ko DC. The awesome power of human genetics of infectious disease. *Annual Review of Genetics*. 2022;56:41-62.
73. Volkman SK, Neafsey DE, Schaffner SF, Park DJ, Wirth DF. Harnessing genomics and genome biology to understand malaria biology. *Nature Reviews Genetics*. 2012;13(5):315-28.
74. Grant AV, Roussillon C, Paul R, Sakuntabhai A. The genetic control of immunity to Plasmodium infection. *BMC immunology*. 2015;16:1-7.
75. Apinjoh TO, Ouattara A, Titanji VP, Djimde A, Amambua-Ngwa A. Genetic diversity and drug resistance surveillance of Plasmodium falciparum for malaria elimination: is there an ideal tool for resource-limited sub-Saharan Africa? *Malaria journal*. 2019;18(1):1-12.
76. Usher CL, McCarroll SA. Complex and multi-allelic copy number variation in human disease. *Briefings in functional genomics*. 2015;14(5):329-38.
77. St Jean PL, Koh GC, Breton JJ, Espino FE, Hien TT, Krudsood S, et al. Pharmacogenetic assessment of tafenoquine efficacy in patients with Plasmodium vivax malaria. *Pharmacogenetics and genomics*. 2020;30(7):161.
78. San JE, Baichoo S, Kanzi A, Moosa Y, Lessells R, Fonseca V, et al. Current affairs of microbial genome-wide association studies: approaches, bottlenecks and analytical pitfalls. *Frontiers in microbiology*. 2020;10:3119.
79. Redmond SN, Eiglmeier K, Mitri C, Markianos K, Guelbeogo WM, Gneme A, et al. Association mapping by pooled sequencing identifies TOLL 11 as a protective factor against Plasmodium falciparum in Anopheles gambiae. *BMC genomics*. 2015;16:1-13.
80. Wendler JP, Okombo J, Amato R, Miotto O, Kiara SM, Mwai L, et al. A genome wide association study of Plasmodium falciparum susceptibility to 22 antimalarial drugs in Kenya. *PLoS One*. 2014;9(5):e96486.
81. Damena D, Agamah FE, Kimathi PO, Kabongo NE, Girma H, Choga WT, et al. In silico Functional Analysis of Genome-Wide Dataset From 17,000 Individuals Identifies Candidate Malaria Resistance Genes Enriched in Malaria Pathogenic Pathways. *Frontiers in Genetics*. 2021;12:676960.
82. Driss A, Hibbert JM, Wilson NO, Iqbal SA, Adamkiewicz TV, Stiles JK. Genetic polymorphisms linked to susceptibility to malaria. *Malaria journal*. 2011;10:1-10.
83. Li J, Wang X, Zhang G, Githure JI, Yan G, James AA. Genome-block expression-assisted association studies discover malaria resistance genes in Anopheles gambiae. *Proceedings of the National Academy of Sciences*. 2013;110(51):20675-80.
84. Volkman SK, Herman J, Lukens AK, Hartl DL. Genome-wide association studies of drug-resistance determinants. *Trends in parasitology*. 2017;33(3):214-30.

85. Borrmann S, Straimer J, Mwai L, Abdi A, Rippert A, Okombo J, et al. Genome-wide screen identifies new candidate genes associated with artemisinin susceptibility in *Plasmodium falciparum* in Kenya. *Scientific reports*. 2013;3(1):3318.
86. Cheeseman IH, McDew-White M, Phyto AP, Sriprawat K, Nosten F, Anderson TJ. Pooled sequencing and rare variant association tests for identifying the determinants of emerging drug resistance in malaria parasites. *Molecular biology and evolution*. 2015;32(4):1080-90.
87. Njoroge H, Van't Hof A, Oruni A, Pipini D, Nagi SC, Lynd A, et al. Identification of a rapidly-spreading triple mutant for high-level metabolic insecticide resistance in *Anopheles gambiae* provides a real-time molecular diagnostic for antimalarial intervention deployment. *Molecular ecology*. 2022;31(16):4307-18.
88. Park DJ, Lukens AK, Neafsey DE, Schaffner SF, Chang HH, Valim C, et al. Sequence-based association and selection scans identify drug resistance loci in the *Plasmodium falciparum* malaria parasite. *Proceedings of the National Academy of Sciences*. 2012;109(32):13052-7.
89. Rider AK, Siwo G, Chawla NV, Ferdig M, Emrich SJ. A statistical approach to finding overlooked genetic associations. *BMC bioinformatics*. 2010;11:1-8.
90. Clark TG, Campino SG, Anastasi E, Auburn S, Teo YY, Small K, et al. A Bayesian approach using covariance of single nucleotide polymorphism data to detect differences in linkage disequilibrium patterns between groups of individuals. *Bioinformatics*. 2010;26(16):1999-2003.
91. Van Tyne D, Park DJ, Schaffner SF, Neafsey DE, Angelino E, Cortese JF, et al. Identification and functional validation of the novel antimalarial resistance locus PF10\_0355 in *Plasmodium falciparum*. *PLoS genetics*. 2011;7(4):e1001383.
92. Auburn S, Campino S, Miotto O, Djimde AA, Zongo I, Manske M, et al. Characterization of within-host *Plasmodium falciparum* diversity using next-generation sequence data. *PloS one*. 2012;7(2):e32891.
93. Howie B, Marchini J, Stephens M. Genotype imputation with thousands of genomes. *G3: Genes— Genomes— Genetics*. 2011;1(6):457-70.
94. Lucas ER, Nagi SC, Egyir-Yawson A, Essandoh J, Dadzie S, Chabi J, et al. Genome-wide association studies reveal novel loci associated with pyrethroid and organophosphate resistance in *Anopheles gambiae* sl. *bioRxiv*. 2023:2023-01.
95. Milet J, Courtin D, Garcia A, Perdry H. Mixed logistic regression in genome-wide association studies. *BMC bioinformatics*. 2020;21:1-17.
96. Riveron JM, Ibrahim SS, Mulamba C, Djouaka R, Irving H, Wondji MJ, et al. Genome-wide transcription and functional analyses reveal heterogeneous molecular mechanisms driving pyrethroids resistance in the major malaria vector *Anopheles funestus* across Africa. *G3: Genes, Genomes, Genetics*. 2017;7(6):1819-32.
97. Tindana P, Bull S, Amenga-Etego L, de Vries J, Aborigo R, Koram K, et al. Seeking consent to genetic and genomic research in a rural Ghanaian setting: a qualitative study of the MalariaGEN experience. *BMC medical ethics*. 2012;13(1):1-12.

98. Wang X, Afrane YA, Yan G, Li J, et al. Constructing a genome-wide LD map of wild *A. gambiae* using next-generation sequencing. *BioMed research international*. 2015;2015.
99. Witzig C, Wondji CS, Strode C, Djouaka R, Ranson H. Identifying permethrin resistance loci in malaria vectors by genetic mapping. *Parasitology*. 2013;140(12):1468-77.
100. Raza SHA, Khan S, Amjadi M, Abdelmour SA, Ohran H, Alanazi KM, et al. Genome-wide association studies reveal novel loci associated with carcass and body measures in beef cattle. *Archives of Biochemistry and Biophysics*. 2020;694:108543.
101. Crawford JE, Riehle MM, Markianos K, Bischoff E, Guelbeogo WM, Gneme A, et al. Evolution of GOUNDRY, a cryptic subgroup of *Anopheles gambiae* sl, and its impact on susceptibility to *Plasmodium* infection. *Molecular ecology*. 2016;25(7):1494-510.
102. Mobegi VA, Duffy CW, Amambua-Ngwa A, Loua KM, Laman E, Nwakanma DC, et al. Genome-wide analysis of selection on the malaria parasite *Plasmodium falciparum* in West African populations of differing infection endemicity. *Molecular biology and evolution*. 2014;31(6):1490-9.
103. Chimusa ER, Meintjies A, Tchanga M, Mulder N, Seoighe C, Soodyall H, et al. A genomic portrait of haplotype diversity and signatures of selection in indigenous southern African populations. *PLoS genetics*. 2015;11(3):e1005052.
104. Gouveia MH, Bergen AW, Borda V, Nunes K, Leal TP, Ogowang MD, et al. Genetic signatures of gene flow and malaria-driven natural selection in sub-Saharan populations of the "endemic Burkitt Lymphoma belt". *PLoS genetics*. 2019;15(3):e1008027.
105. Kassegne K, Komi Koukoura K, Shen HM, Chen SB, Fu HT, Chen YQ, et al. Genome-wide analysis of the malaria parasite *Plasmodium falciparum* isolates from Togo reveals selective signals in immune selection-related antigen genes. *Frontiers in Immunology*. 2020;11:552698.
106. Mu J, Awadalla P, Duan J, McGee KM, Joy DA, McVean GAT, et al. Recombination hotspots and population structure in *Plasmodium falciparum*. *PLoS biology*. 2005;3(10):e335.
107. Ndo C, Antonio-Nkondjio C, Cohuet A, Ayala D, Kengne P, Morlais I, et al. Population genetic structure of the malaria vector *Anopheles nili* in sub-Saharan Africa. *Malaria journal*. 2010;9:1-13.
108. HEE OT. Population diversity as quantified by inter-population variation in patterns of linkage disequilibrium. 2012.
109. Hamilton F, Mitchell RE, Constantinescu A, Hughes D, Cunningham A, Ghazal P, et al. The effect of interleukin-6 signaling on severe malaria: A Mendelian randomization analysis. *International Journal of Infectious Diseases*. 2023;129:251-9.
110. Shah SS, Macharia A, Makale J, Uyoga S, Kivinen K, Craik R, et al. Genetic determinants of glucose-6-phosphate dehydrogenase activity in Kenya. *BMC medical genetics*. 2014;15(1):1-10.



111. Olewe PK, Awandu SS, Munde EO, Anyona SB, Raballah E, Amolo AS, et al. Hemoglobinopathies, merozoite surface protein-2 gene polymorphisms, and acquisition of Epstein Barr virus among infants in Western Kenya. *BMC cancer*. 2023;23(1):1-12.
112. Esoh KK, Apinjoh TO, Nyanjom SG, Wonkam A, Chimusa ER, Amenga-Etego L, et al. Fine scale human genetic structure in three regions of Cameroon reveals episodic diversifying selection. *Scientific reports*. 2021;11(1):1039.
113. Mtatiro SN, Singh T, Rooks H, Mgaya J, Mariki H, Soka D, et al. Genome wide association study of fetal hemoglobin in sickle cell anemia in Tanzania. *PloS one*. 2014;9(11):e111464.
114. Gichohi-Wainaina WN, Tanaka T, Towers GW, Verhoef H, Veenemans J, Talsma EF, et al. Associations between common variants in iron-related genes with haematological traits in populations of African ancestry. *PLoS One*. 2016;11(6):e0157996.
115. Network MGE, Band G, Le QS, Clarke GM, Kivinen K, Hubbart C, et al. New insights into malaria susceptibility from the genomes of 17,000 individuals from Africa, Asia, and Oceania. *bioRxiv*. 2019:535898.
116. Stewart C, Pepper MS. Cystic fibrosis on the African continent. *Genetics in Medicine*. 2016;18(7):653-62.
117. Sirugo G, Williams SM, Tishkoff SA. The missing diversity in human genetic studies. *Cell*. 2019;177(1):26-31.
118. Melzer D, Pilling LC, Ferrucci L. The genetics of human ageing. *Nature Reviews Genetics*. 2020;21(2):88-101.
119. Bellivier F. Genetic association studies: definition of cases and controls. *Psychiatric Genetics: Methods and Reviews*. 2003:127-41.
120. Loley C, König IR, Hothorn L, Ziegler A. A unifying framework for robust association testing, estimation, and genetic model selection using the generalized linear model. *European Journal of Human Genetics*. 2013 Dec;21(12):1442-8. Available from: <http://www.nature.com/doi/10.1038/ejhg.2013.62>.
121. Zilin, Li, Sijian, Wang, Xihong, Lin. Variable selection and estimation in generalized linear models with the seamless L0 penalty; 2012.
122. Hothorn LA, Hothorn T. Order-restricted Scores Test for the Evaluation of Population-based Case-control Studies when the Genetic Model is Unknown. *Biometrical Journal*. 2009;51(4):659-69. Available from: <http://onlinelibrary.wiley.com/doi/10.1002/bimj.200800203/full>.
123. Zintzaras E, Santos M. Performance of MAX test and degree of dominance index in predicting the mode of inheritance. *Statistical applications in genetics and molecular biology*. 2012;11(4).
124. Hothorn LA, Hothorn T. Order-restricted Scores Test for the Evaluation of Population-based Case-control Studies when the Genetic Model is Unknown. *Biometrical Journal: Journal of Mathematical Methods in Biosciences*. 2009;51(4):659-69.

125. Zang Y, Fung WK, Zheng G, et al. Simple algorithms to calculate the asymptotic null distributions of robust tests in case-control genetic association studies in R. *Journal of Statistical software*. 2010;33(8).
126. González JR, Carrasco JL, Dudbridge F, Armengol L, Estivill X, Moreno V. Maximizing association statistics over genetic models. *Genetic Epidemiology: The Official Publication of the International Genetic Epidemiology Society*. 2008;32(3):246-54.
127. Zheng G, Joo J, Yang Y. Pearson's test, trend test, and MAX are all trend tests with different types of scores. *Annals of human genetics*. 2009;73(2):133-40.
128. Gurdasani D, Carstensen T, Tekola-Ayele F, Pagani L, Tachmazidou I, Hatzikotoulas K, et al. The African genome variation project shapes medical genetics in Africa. *Nature*. 2015;517(7534):327-32.
129. Sharaf A, Ndiribe CC, Omotoriogun TC, Abueg L, Badaoui B, Markey FJB, et al. Open Institute of the African BioGenome Project: Bridging the gap in African biodiversity genomics and bioinformatics. 2023.

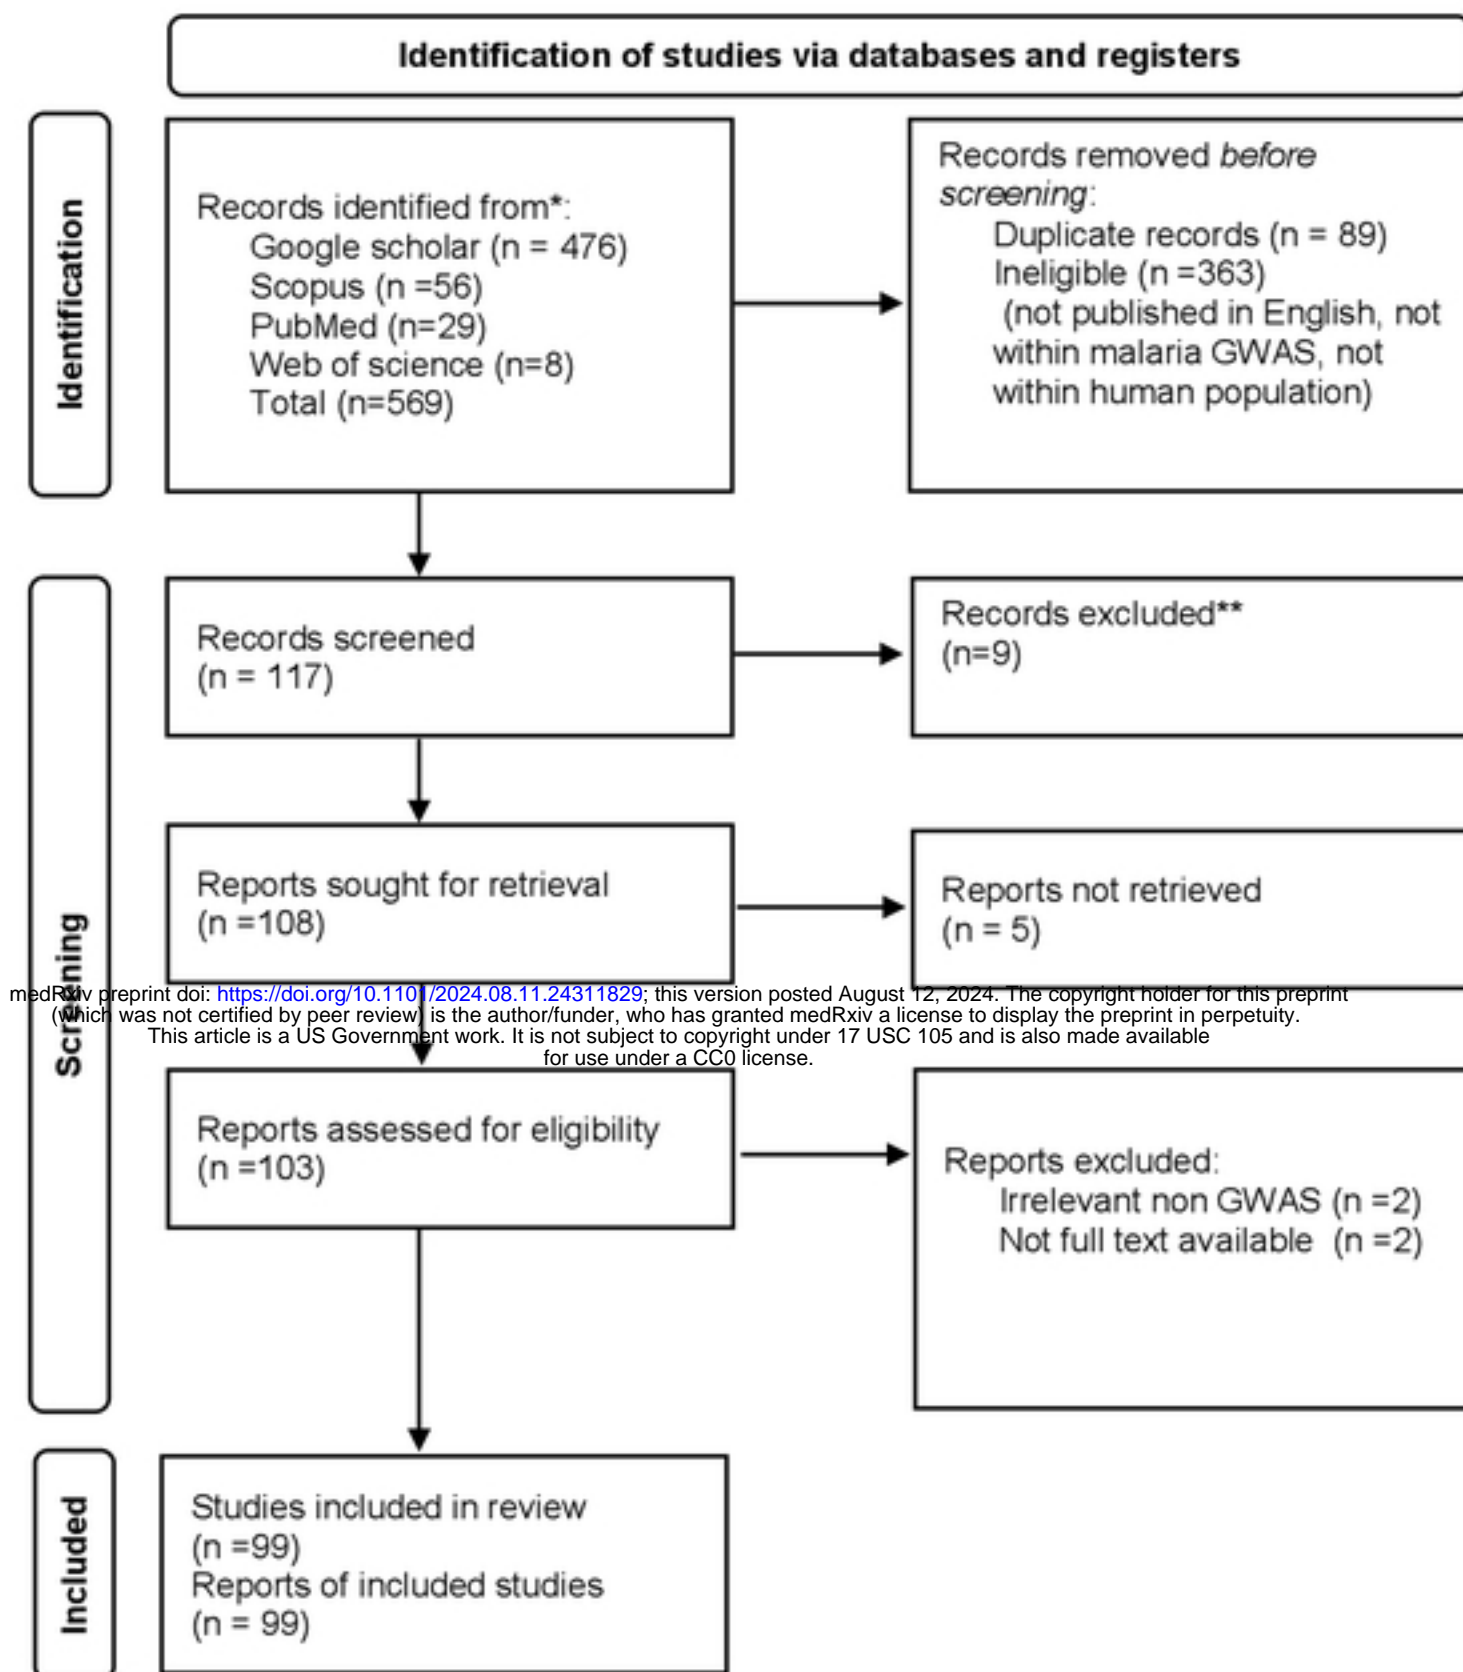

\* Number of records identified from each database.

\*\* Records excluded: not malaria phenotypes, not SSA populations.

Fig 1

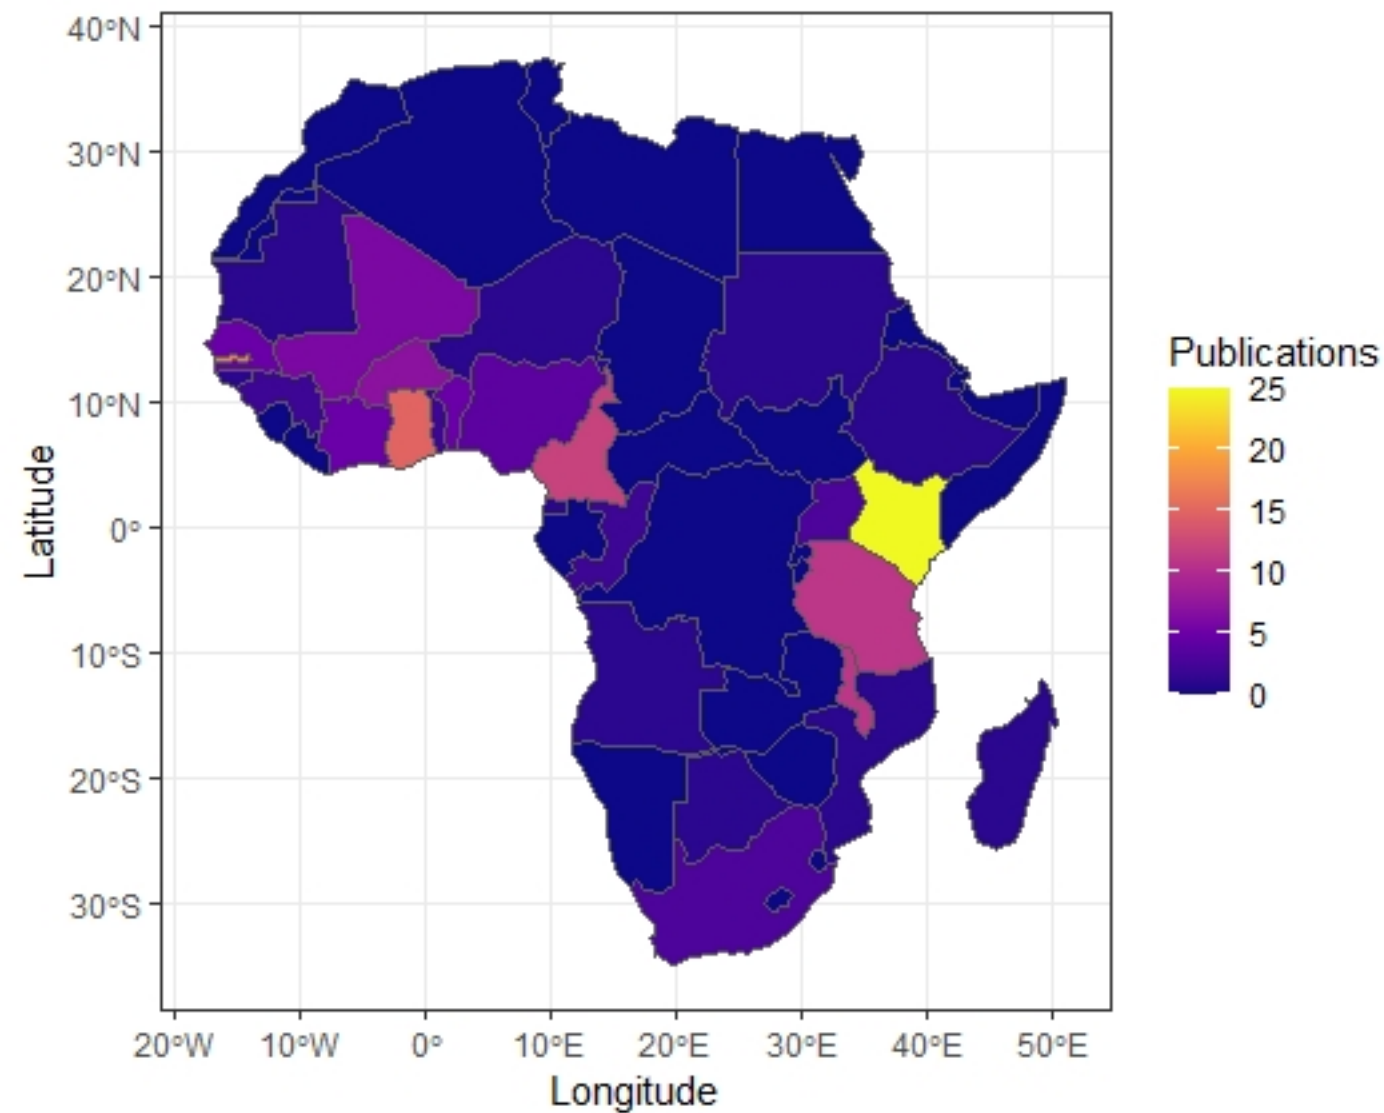

Fig 5

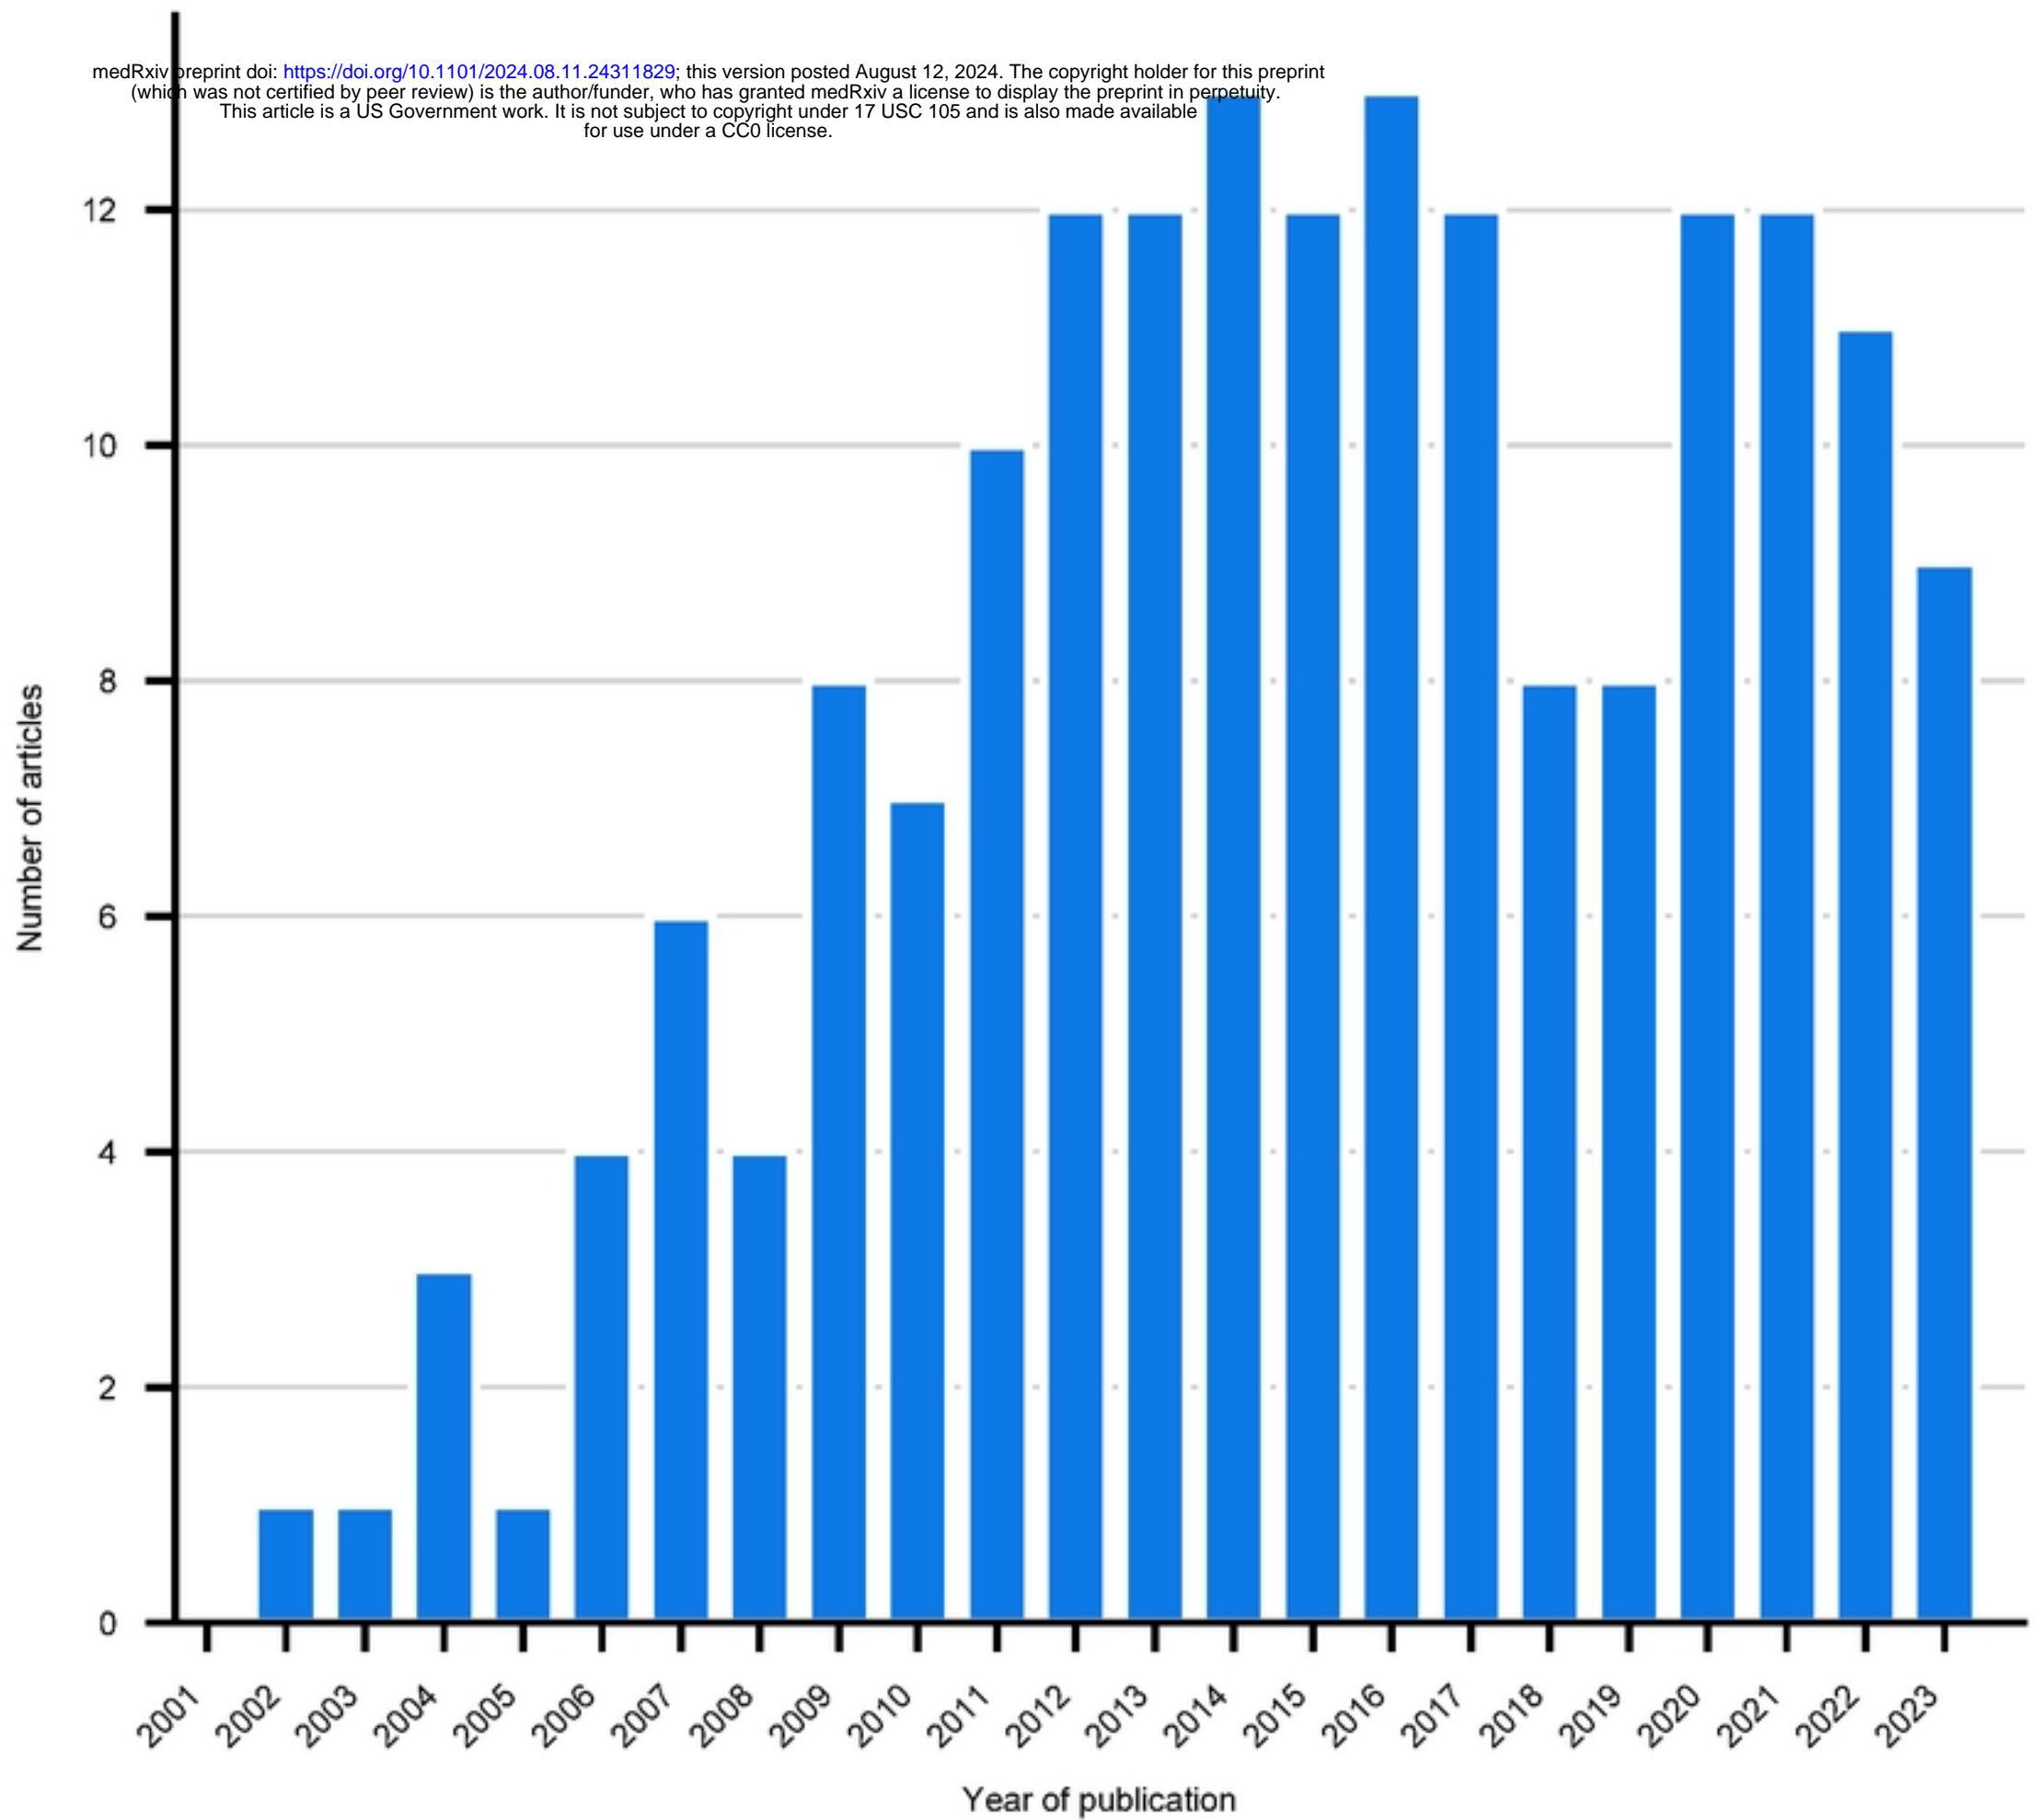

Fig 2

medRxiv preprint doi: <https://doi.org/10.1101/2024.08.11.24311829>; this version posted August 12, 2024. The copyright holder for this preprint (which was not certified by peer review) is the author/funder, who has granted medRxiv a license to display the preprint in perpetuity. This article is a US Government work. It is not subject to copyright under 17 USC 105 and is also made available for use under a CC0 license.

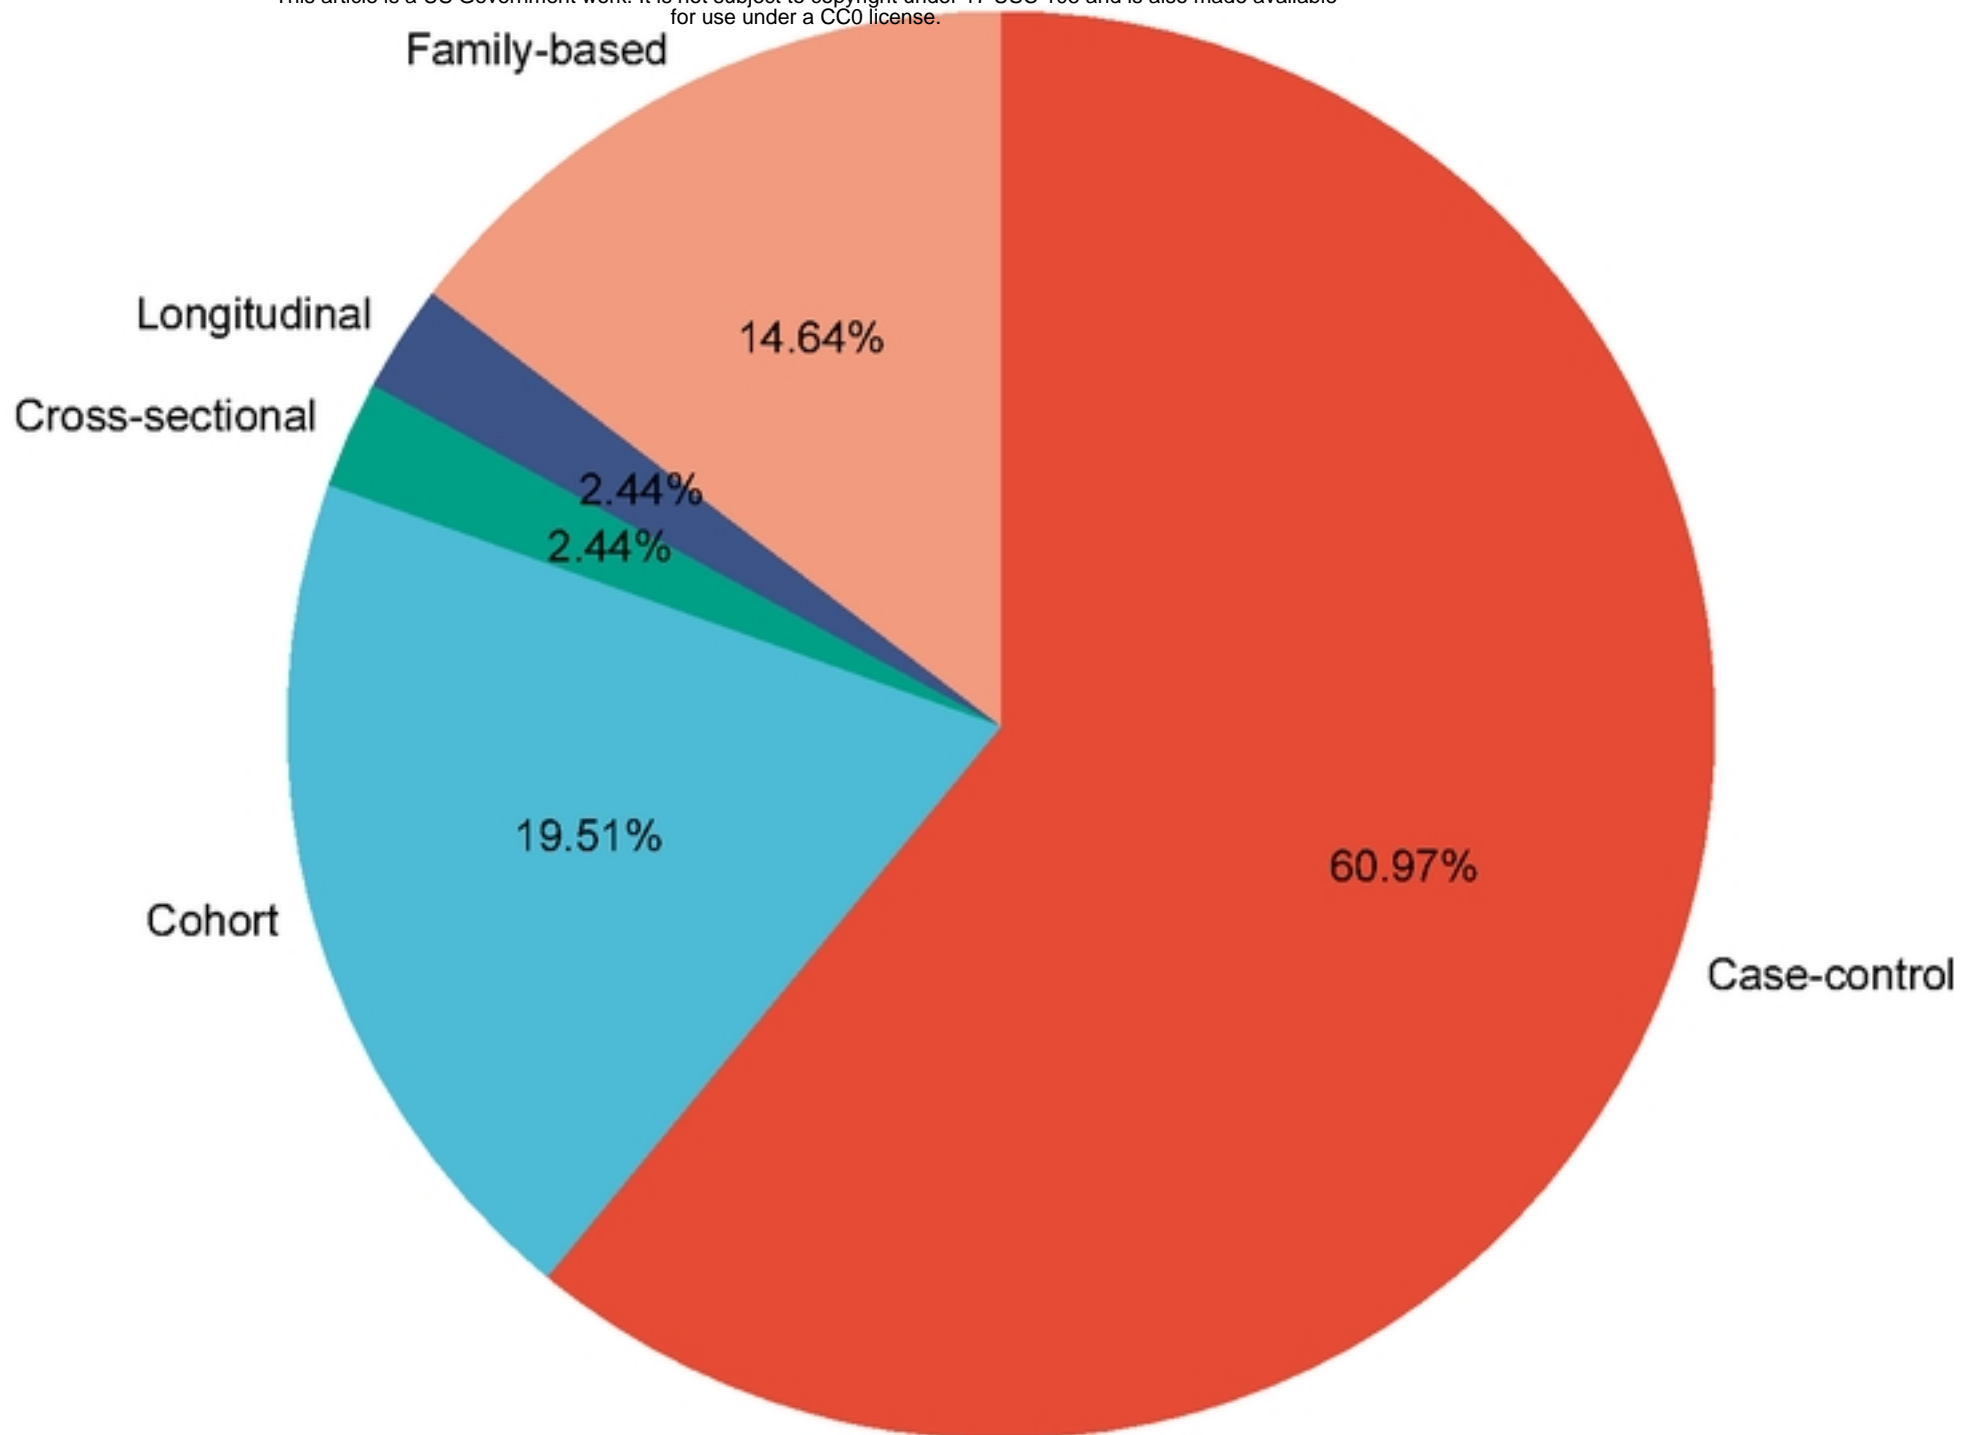

Fig 3

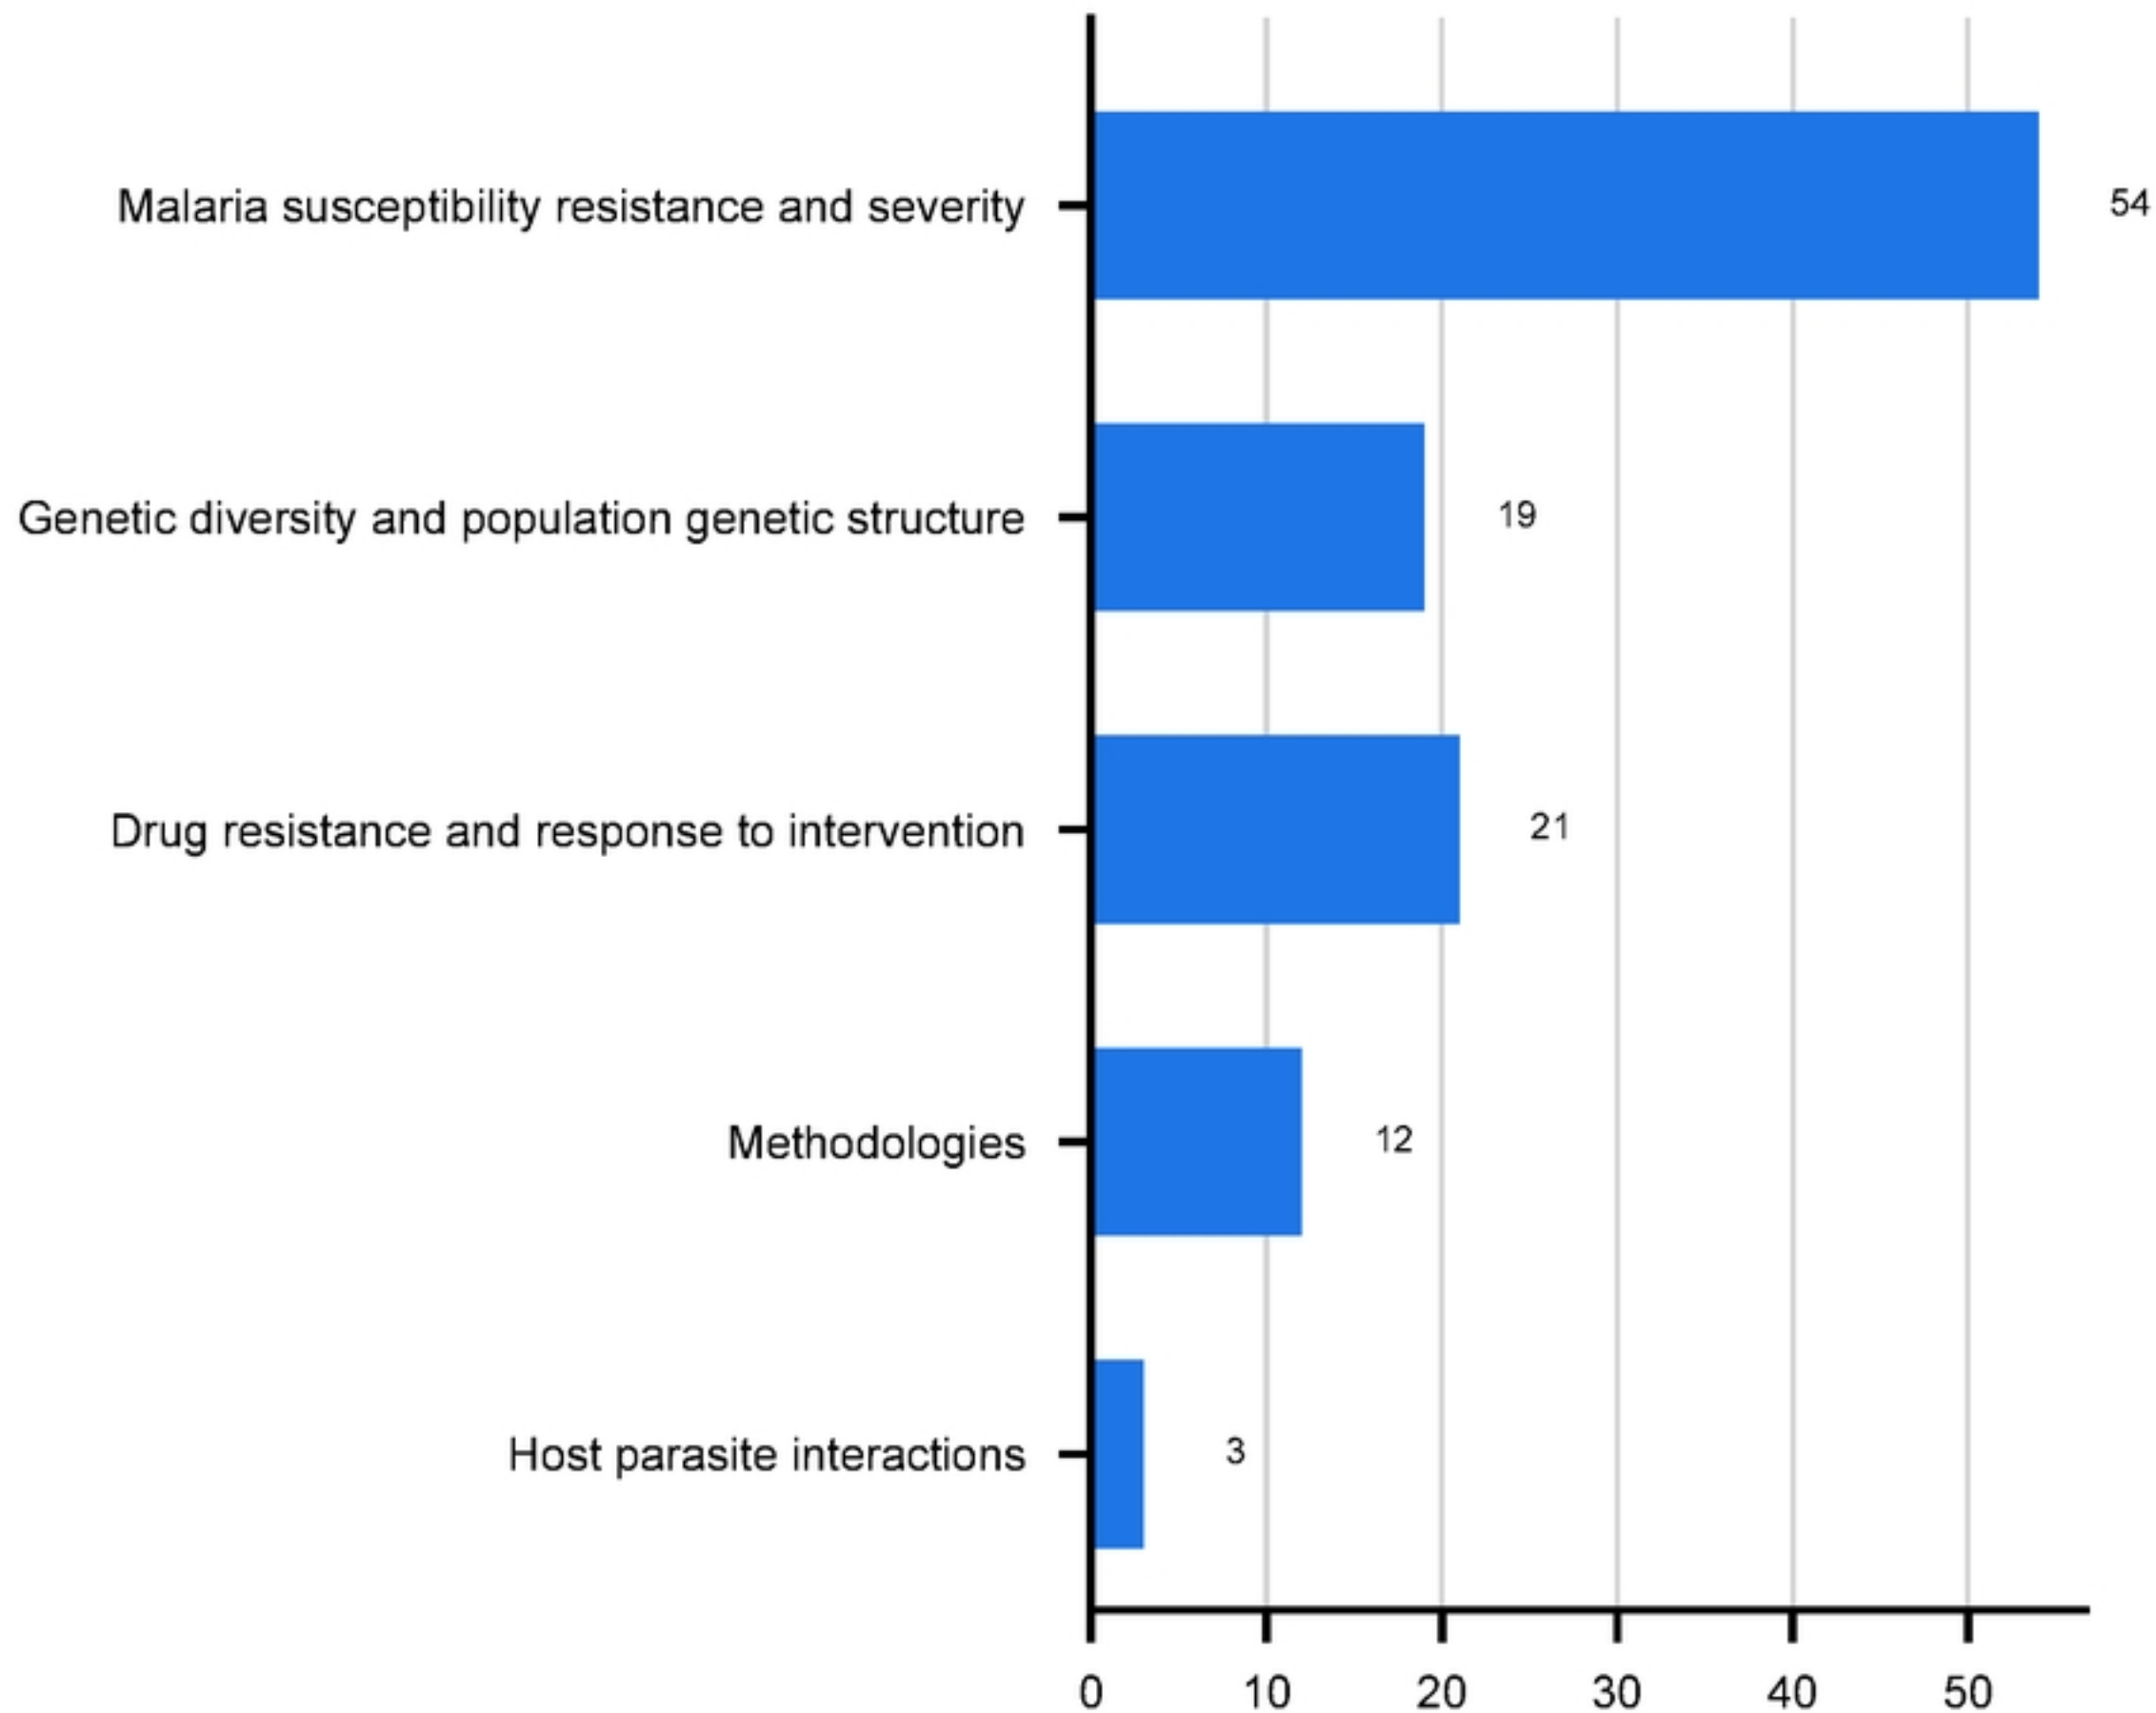

Fig 4

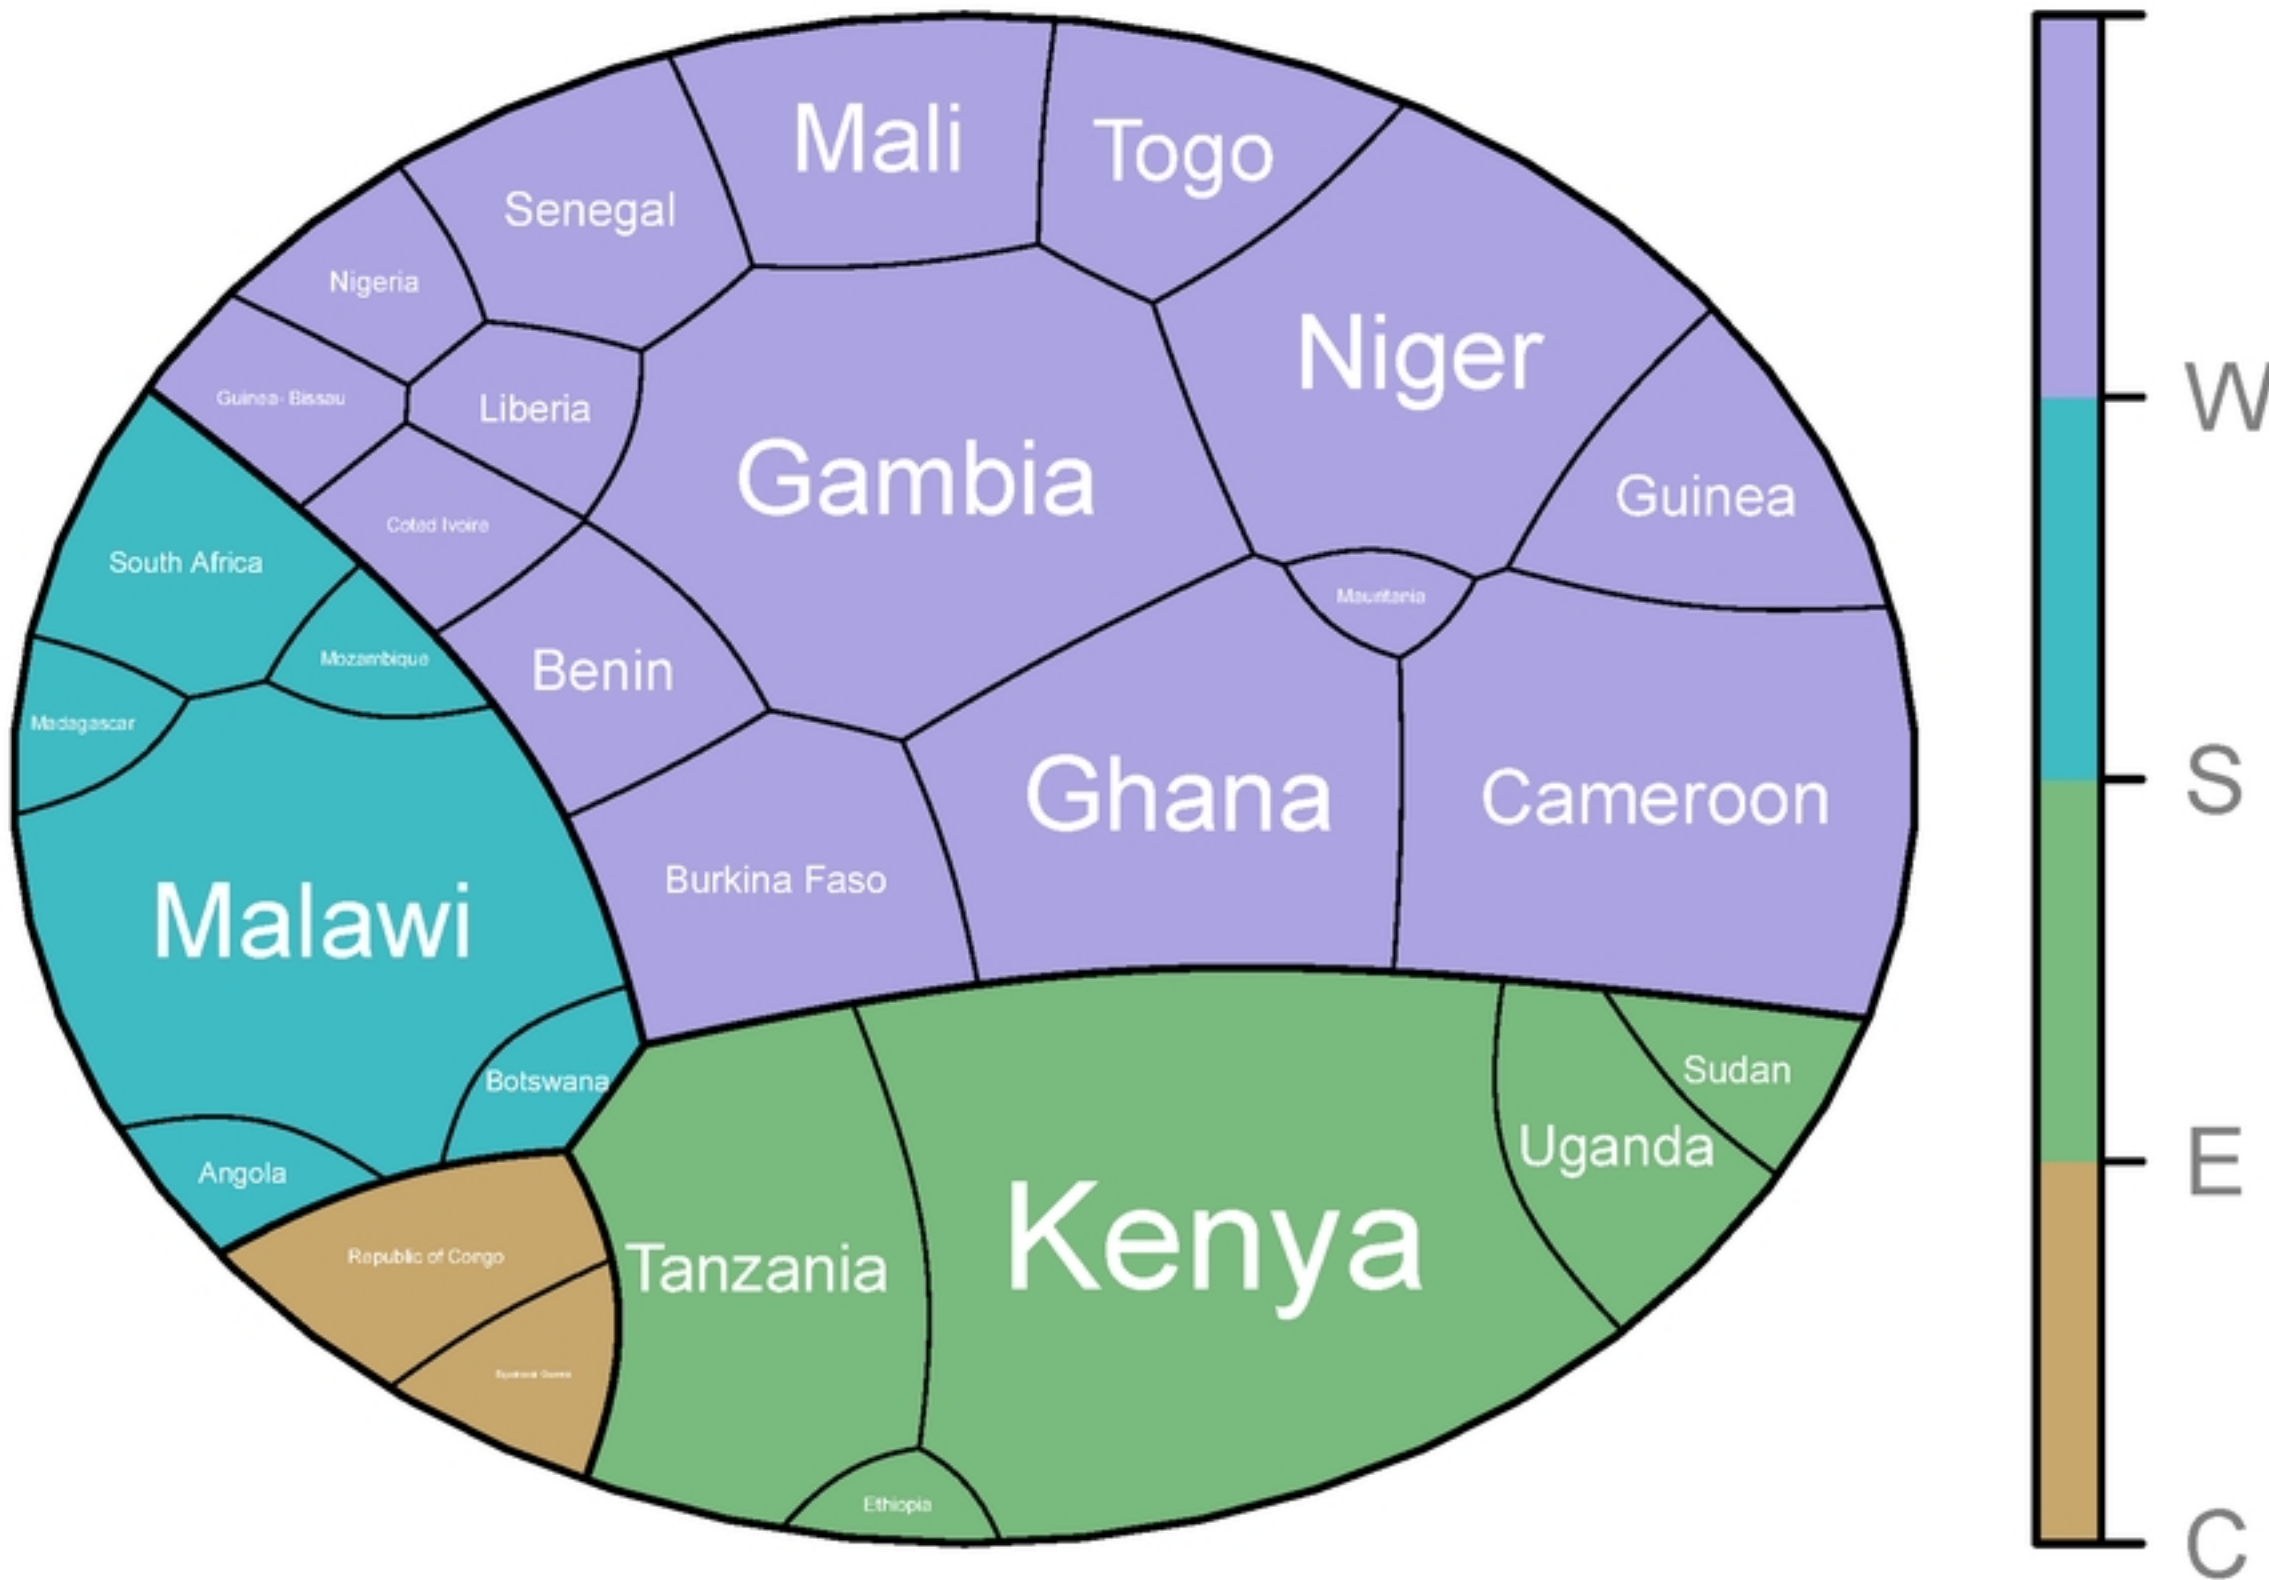

Fig 6



medRxiv preprint doi: <https://doi.org/10.1101/2024.08.11.24311829>; this version posted August 12, 2024. The copyright holder for this preprint (which was not certified by peer review) is the author/funder, who has granted medRxiv a license to display the preprint in perpetuity. This article is a US Government work. It is not subject to copyright under 17 USC 105 and is also made available for use under a CC0 license.

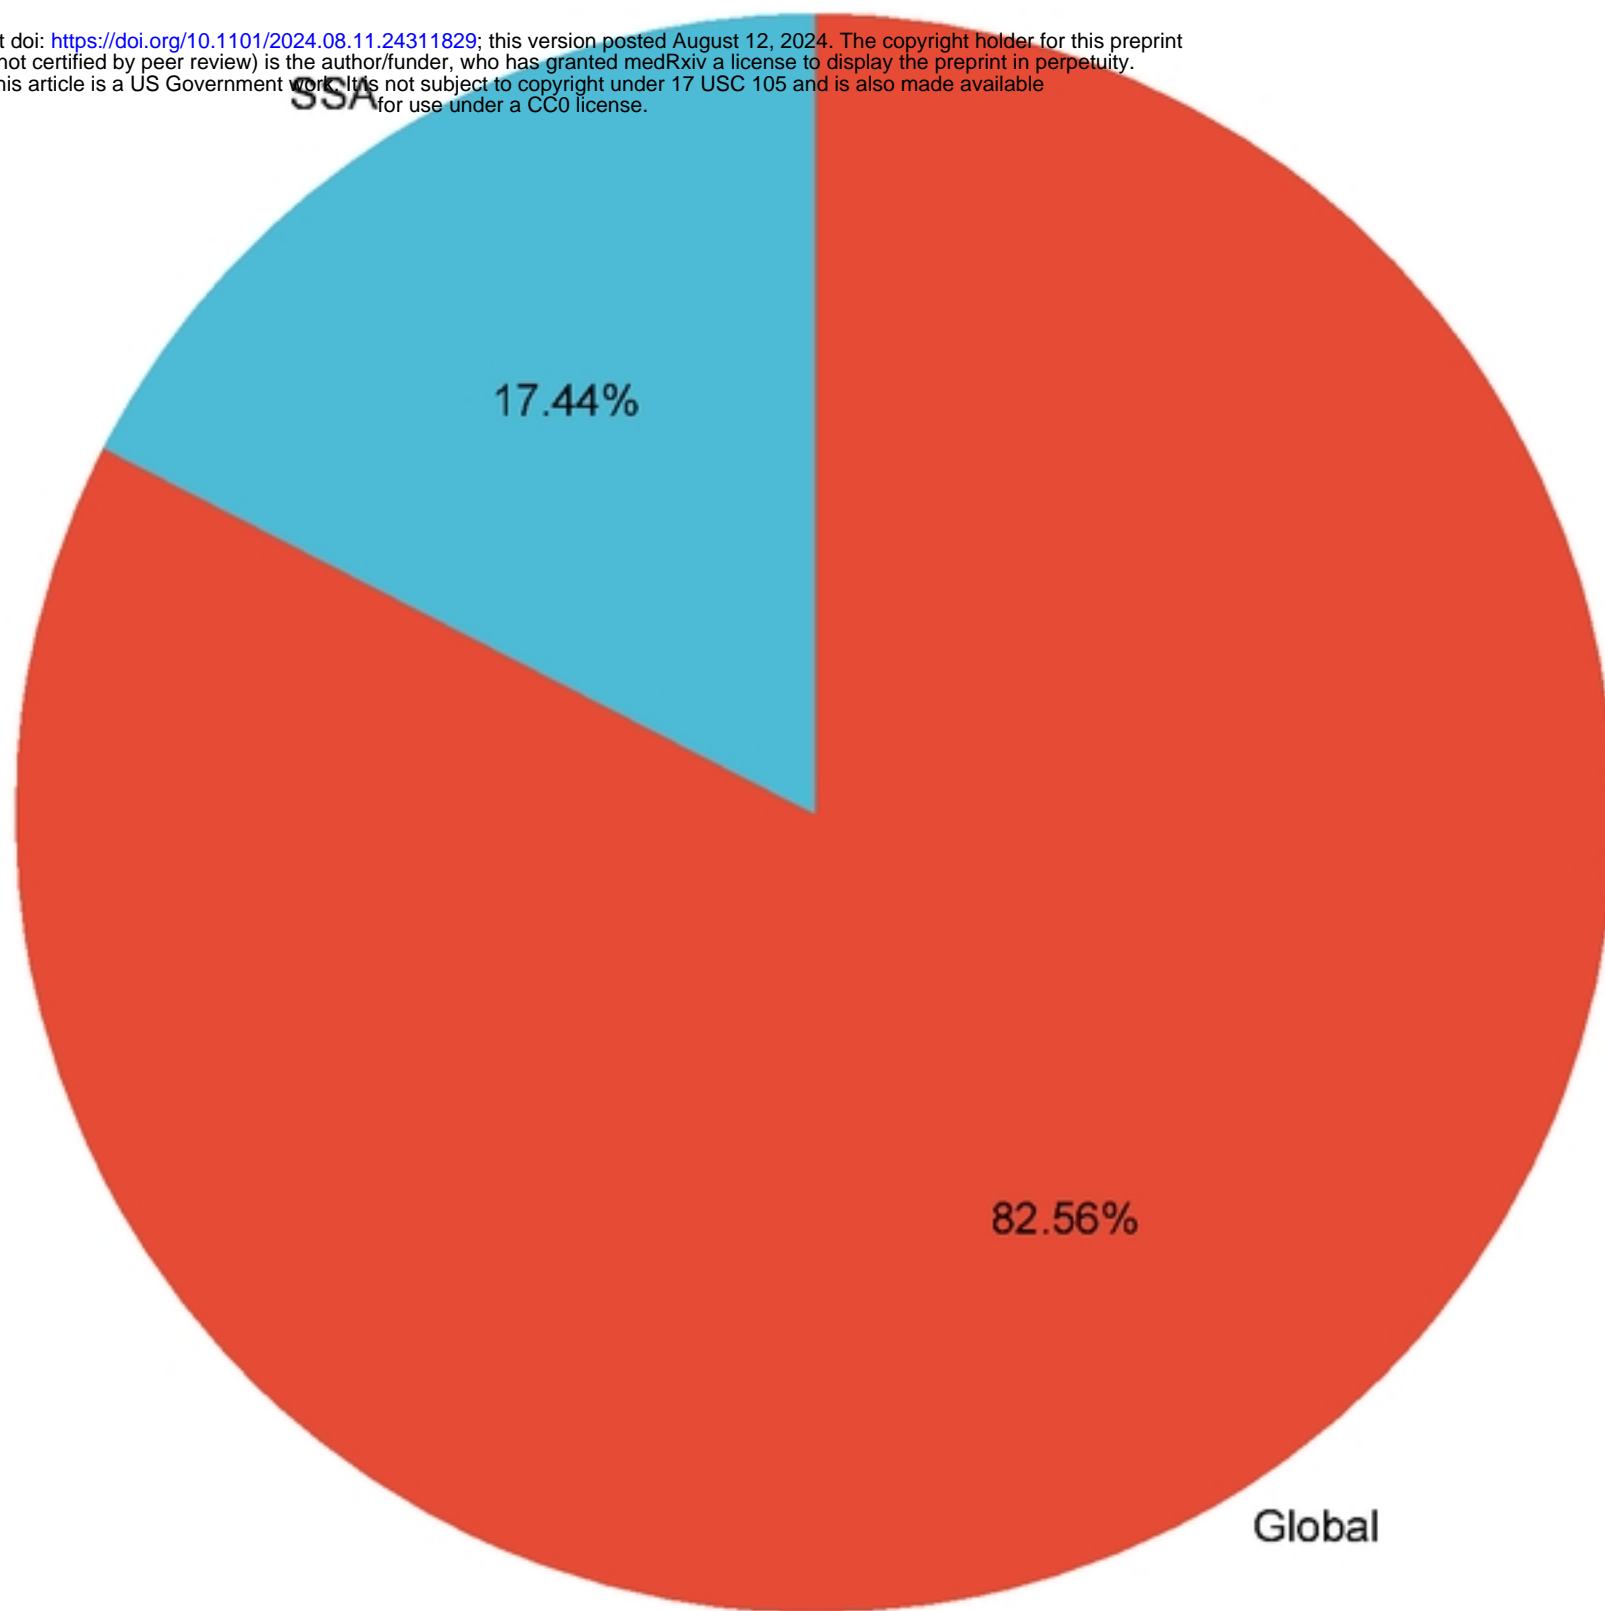

Fig 7
